# Supplementary material for: Spatiotemporal Variability in Wastewater-Derived Carbapenem-Resistance Genes from Diverse Municipal Sources in the Laurentian Great Lakes Catchment
Source: Research Square preprint supplement (doi:10.21203/rs.3.rs-8206721/v1), 2026-01-14
Supplement: Supplementary file 1 [file aac2c769c30b1e86df01e554.docx]

**Supplementary Materials**


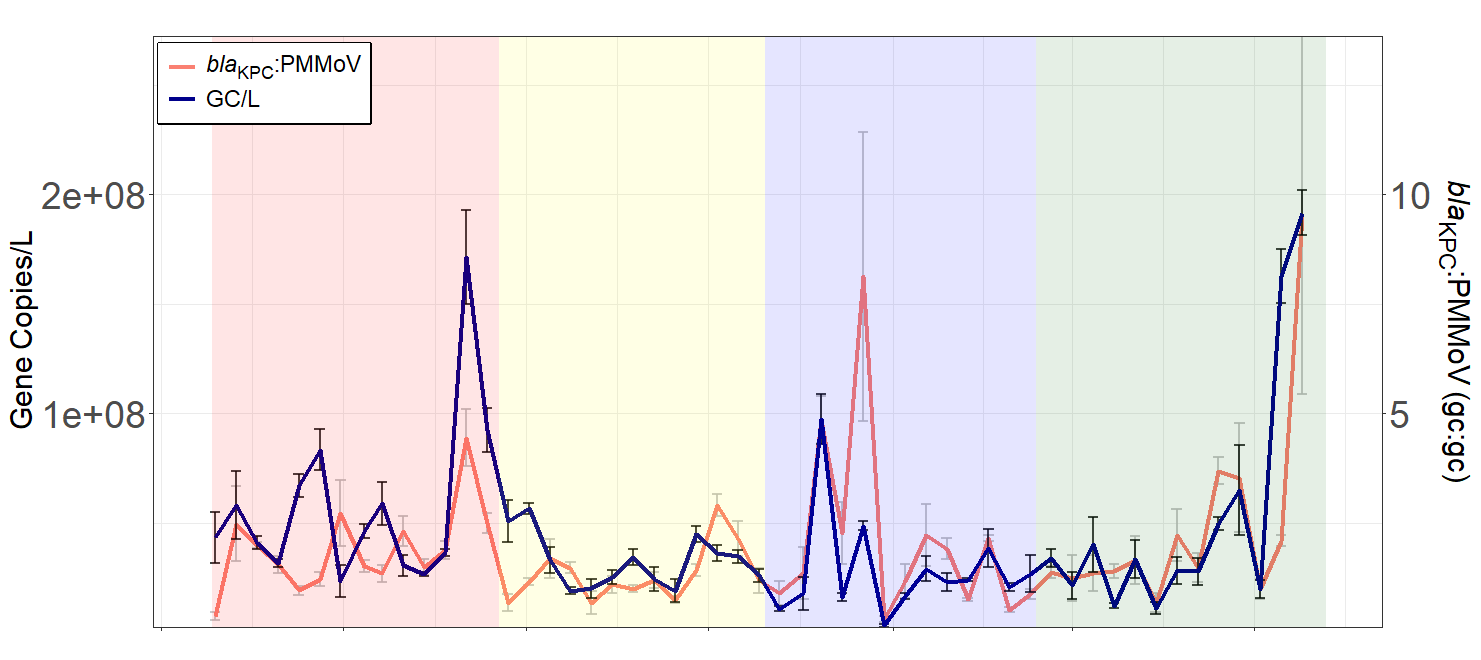

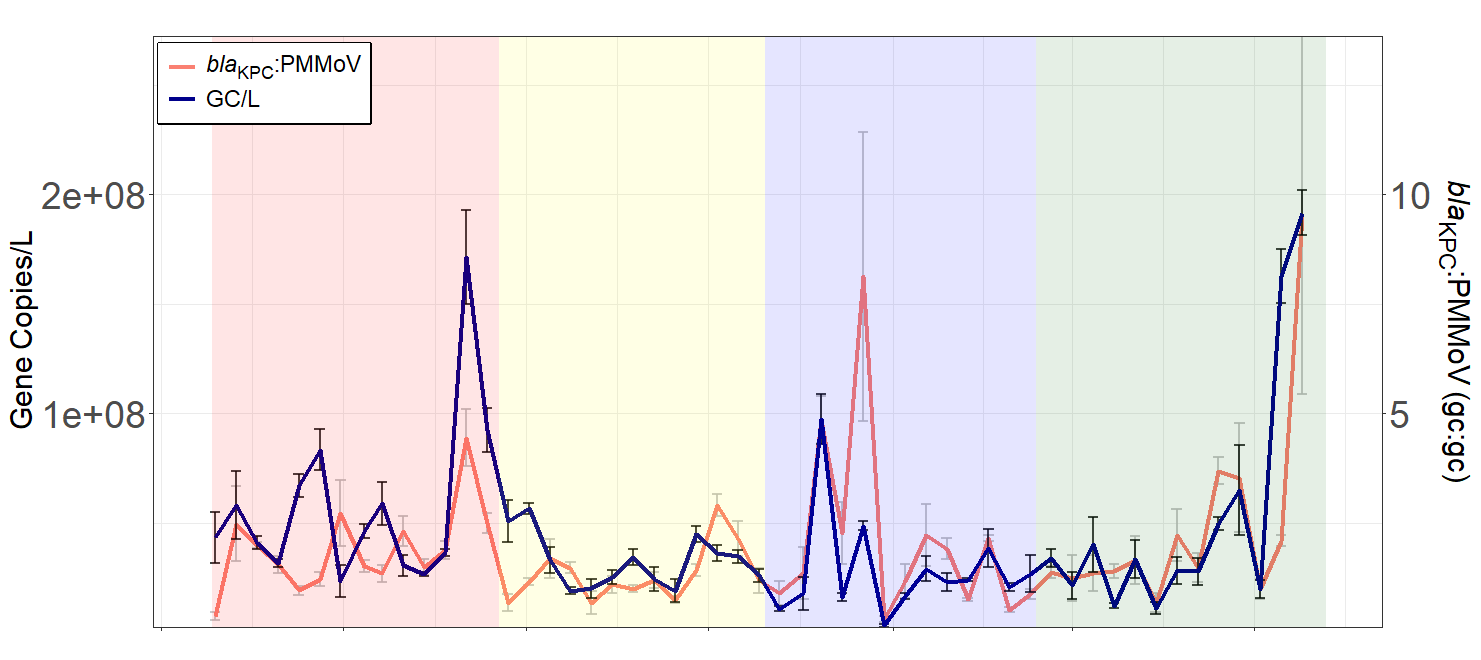
 *bla*KPC  *bla*NDM

LPCC


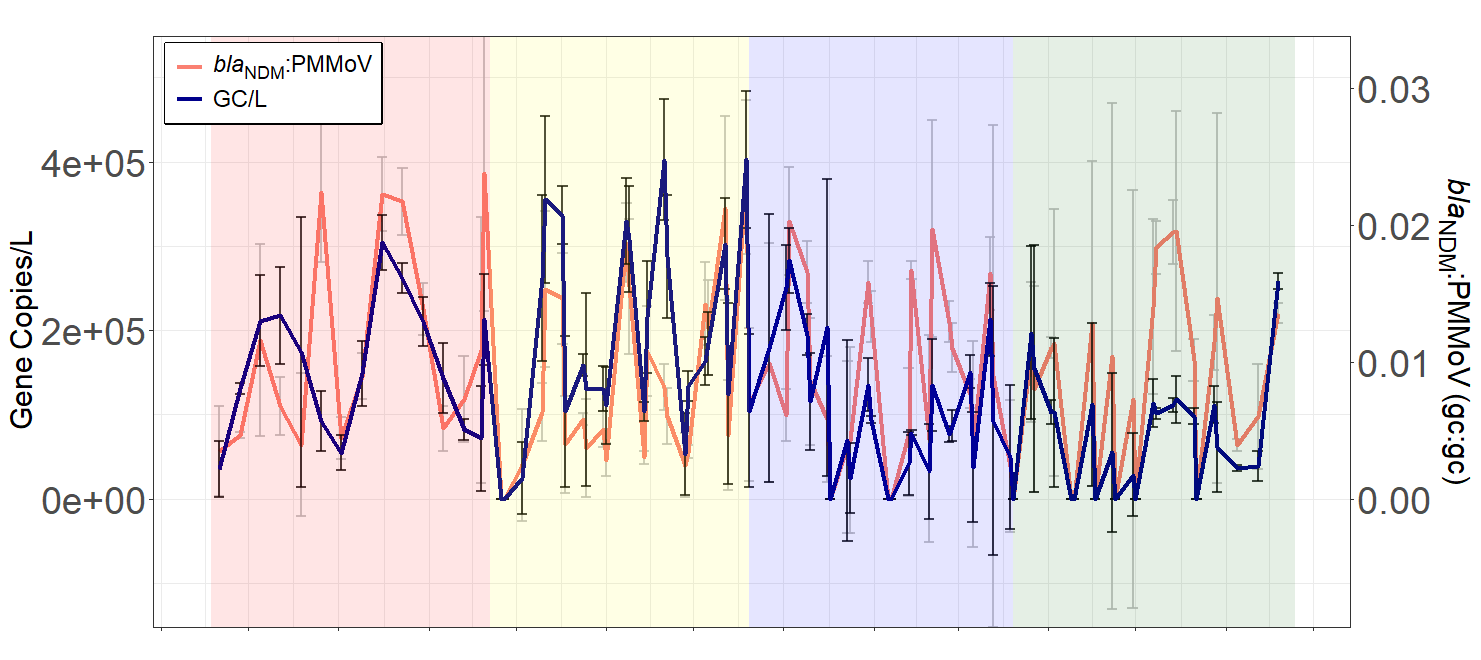

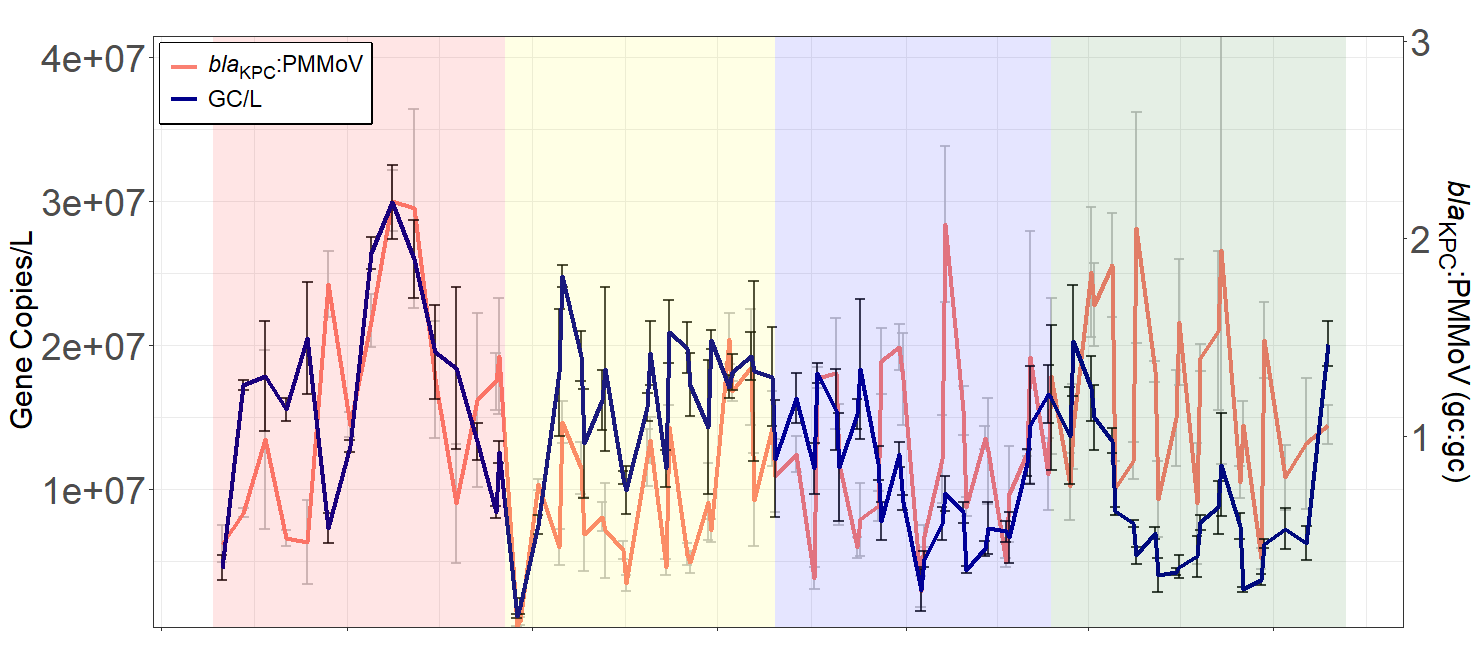


TB


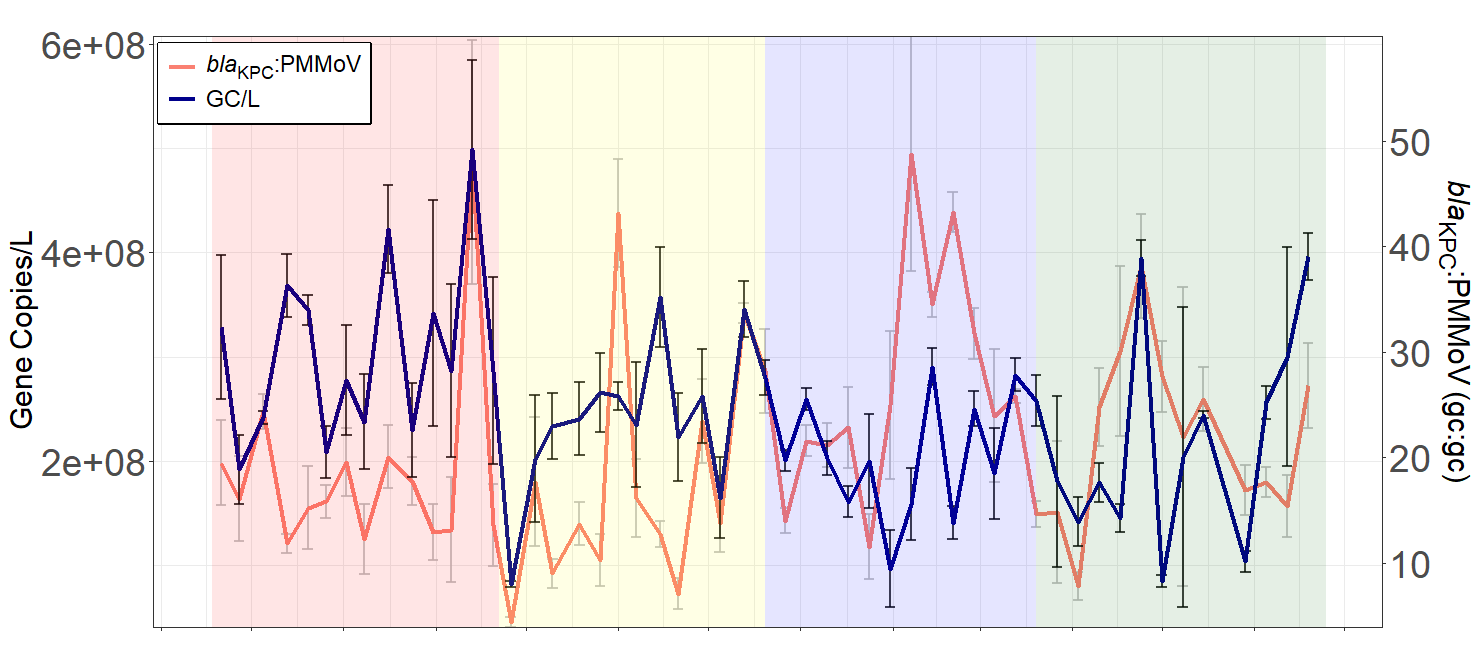


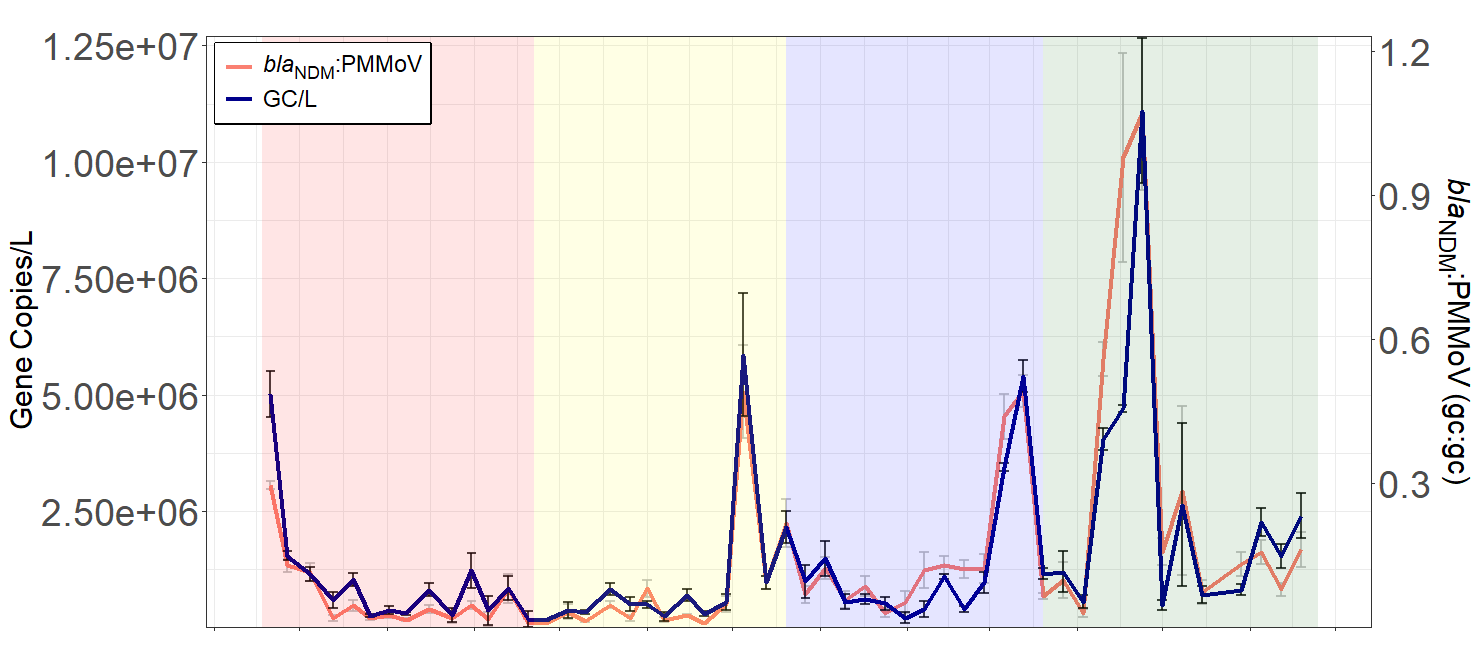


NIEA


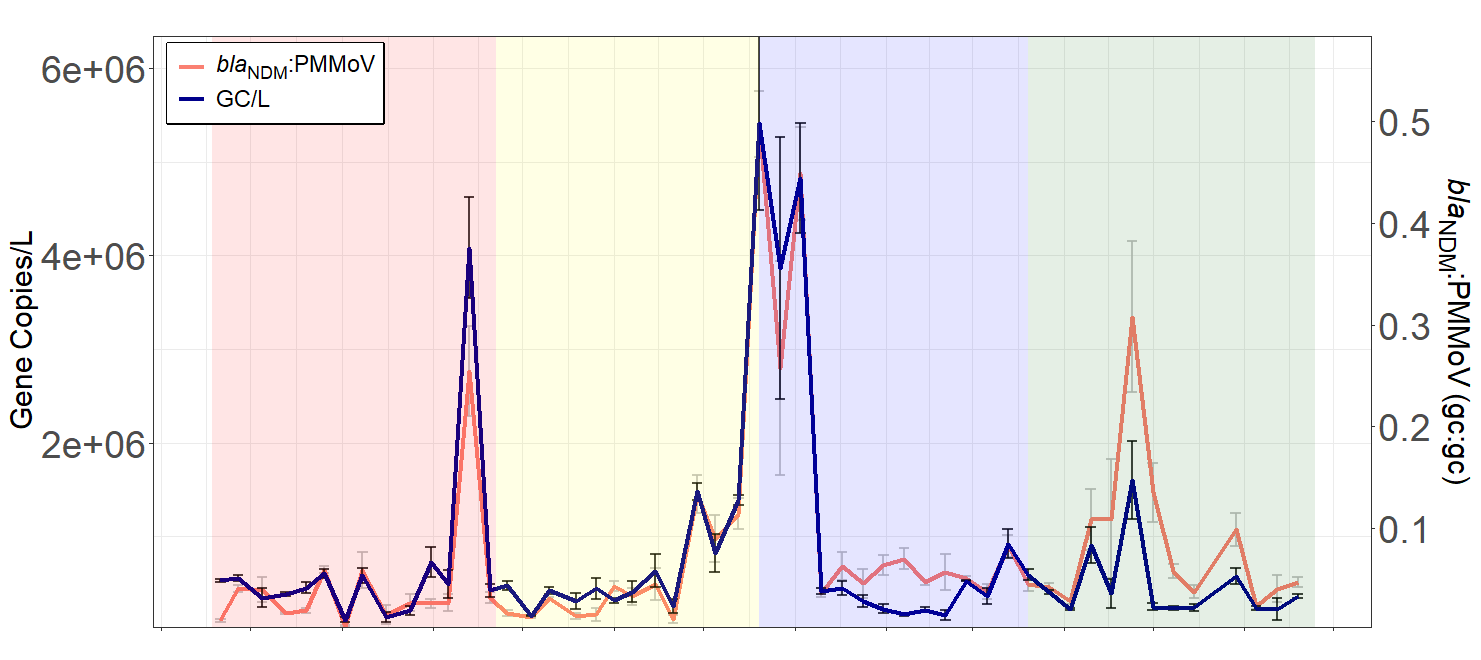

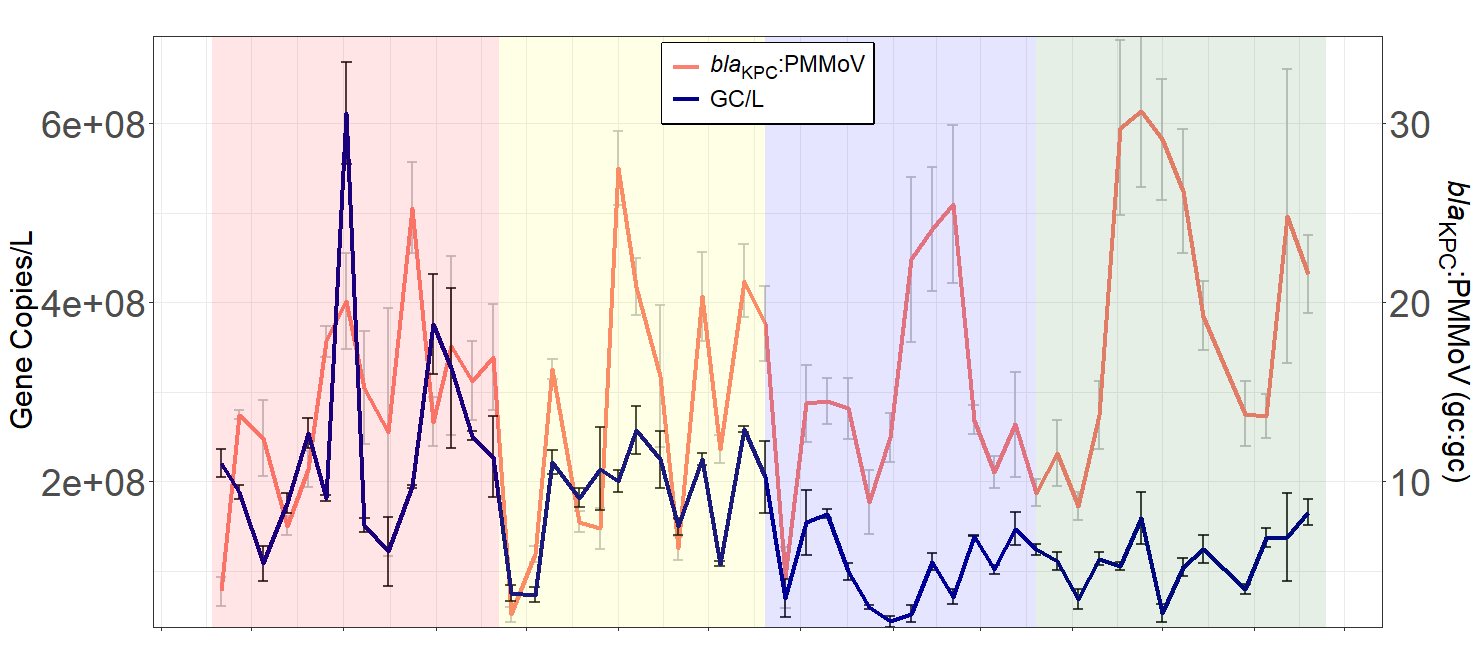


OAK


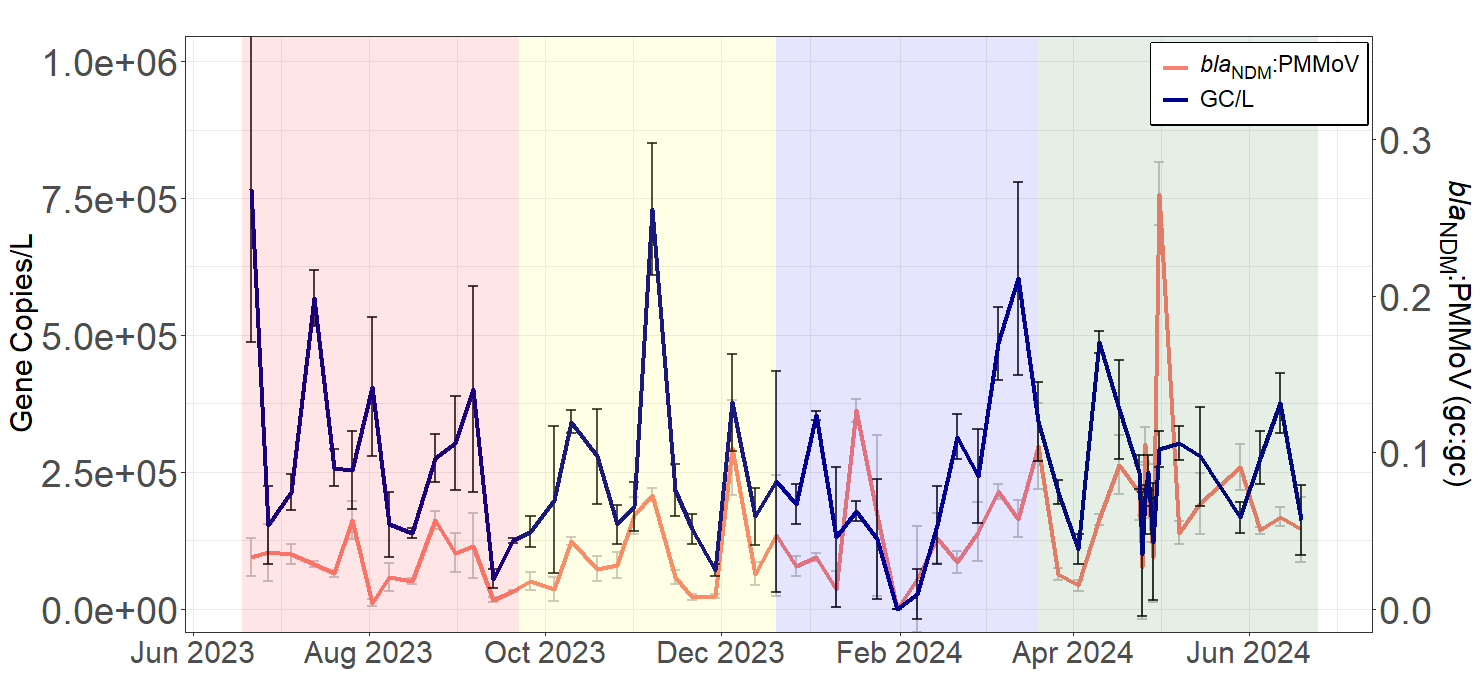

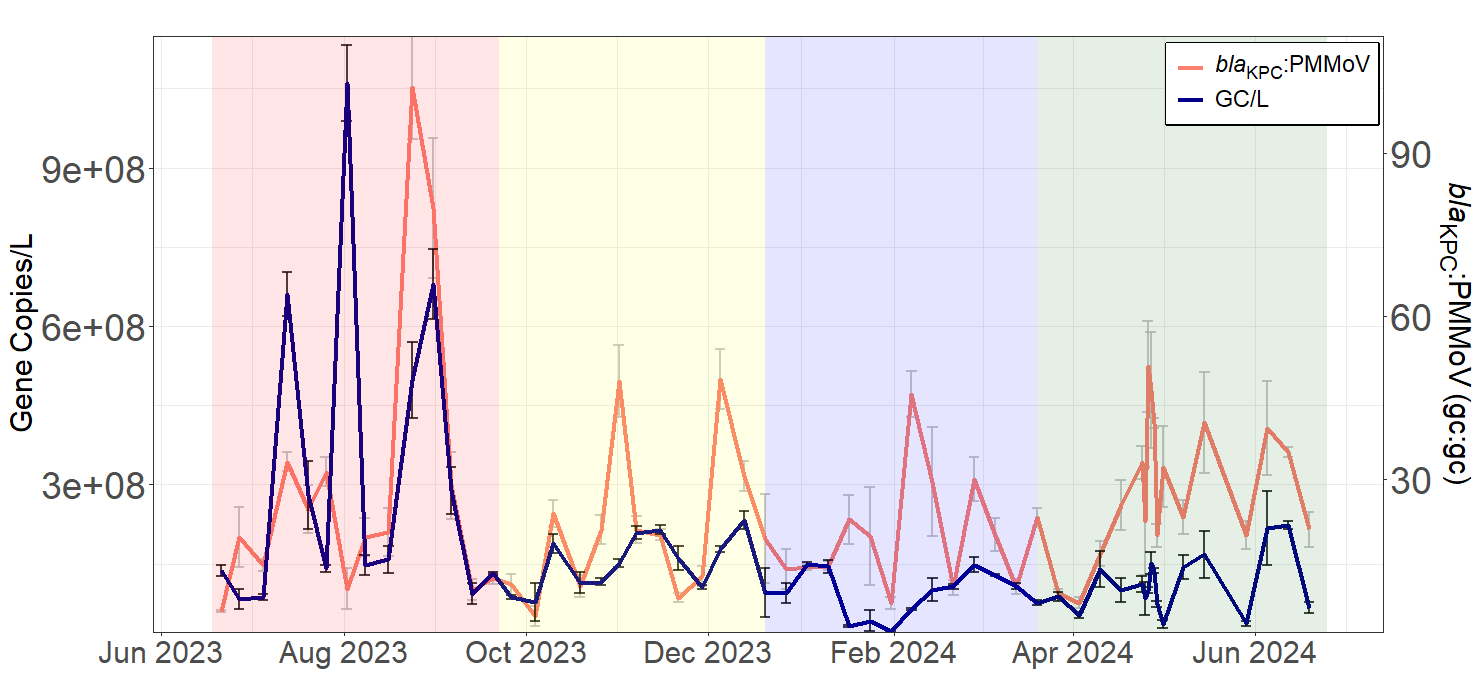


JEFF


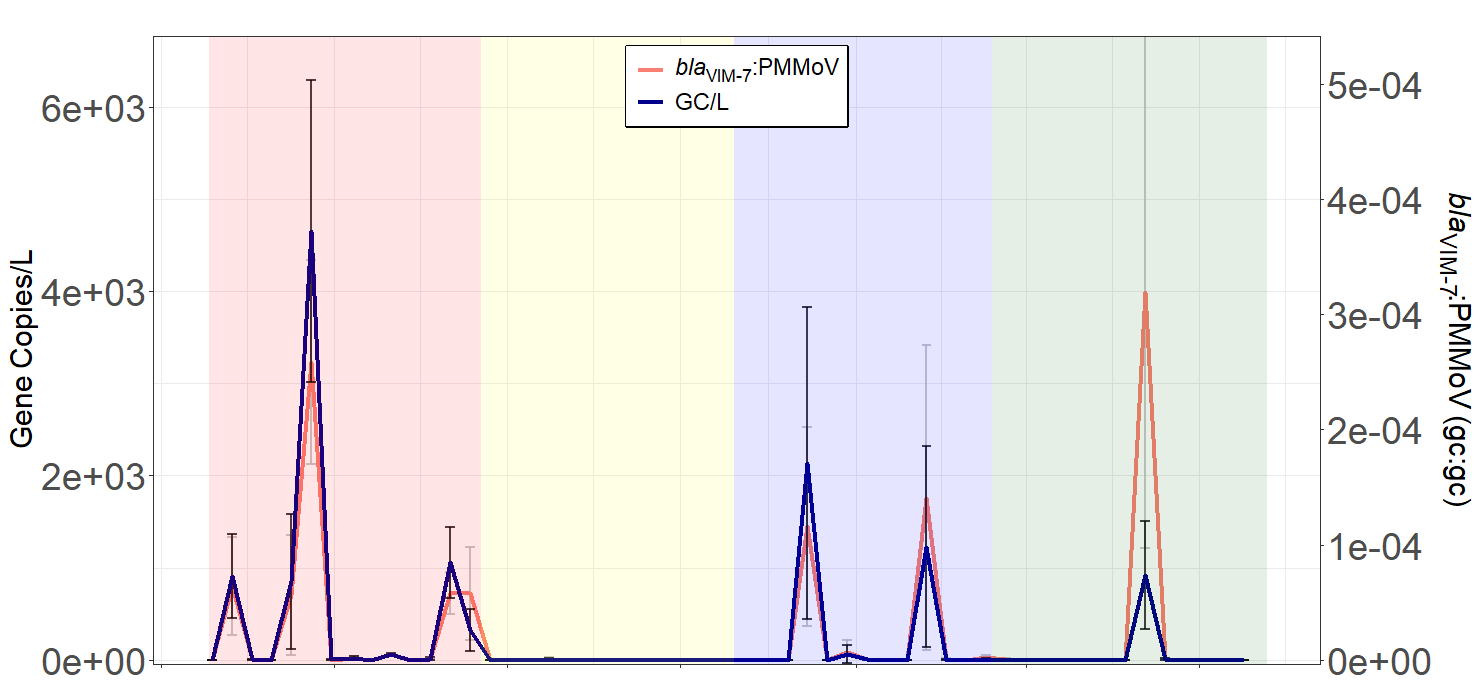

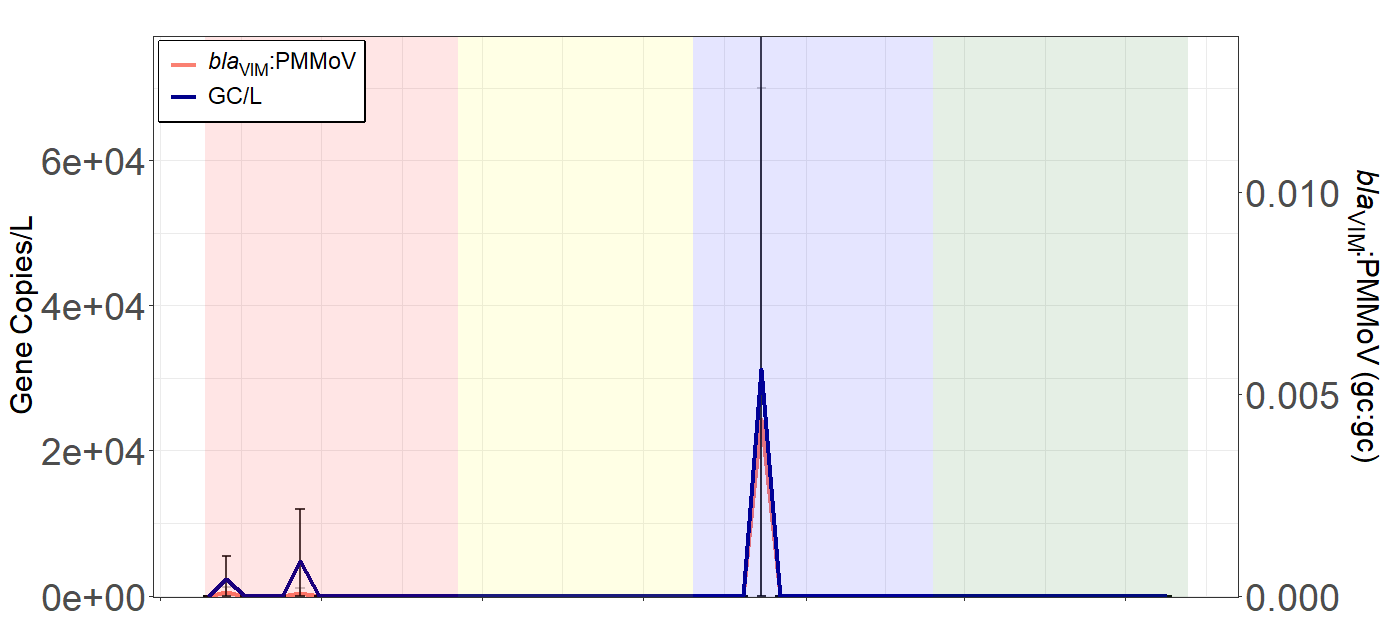
 *bla*VIM  *bla*VIM-7

LPCC


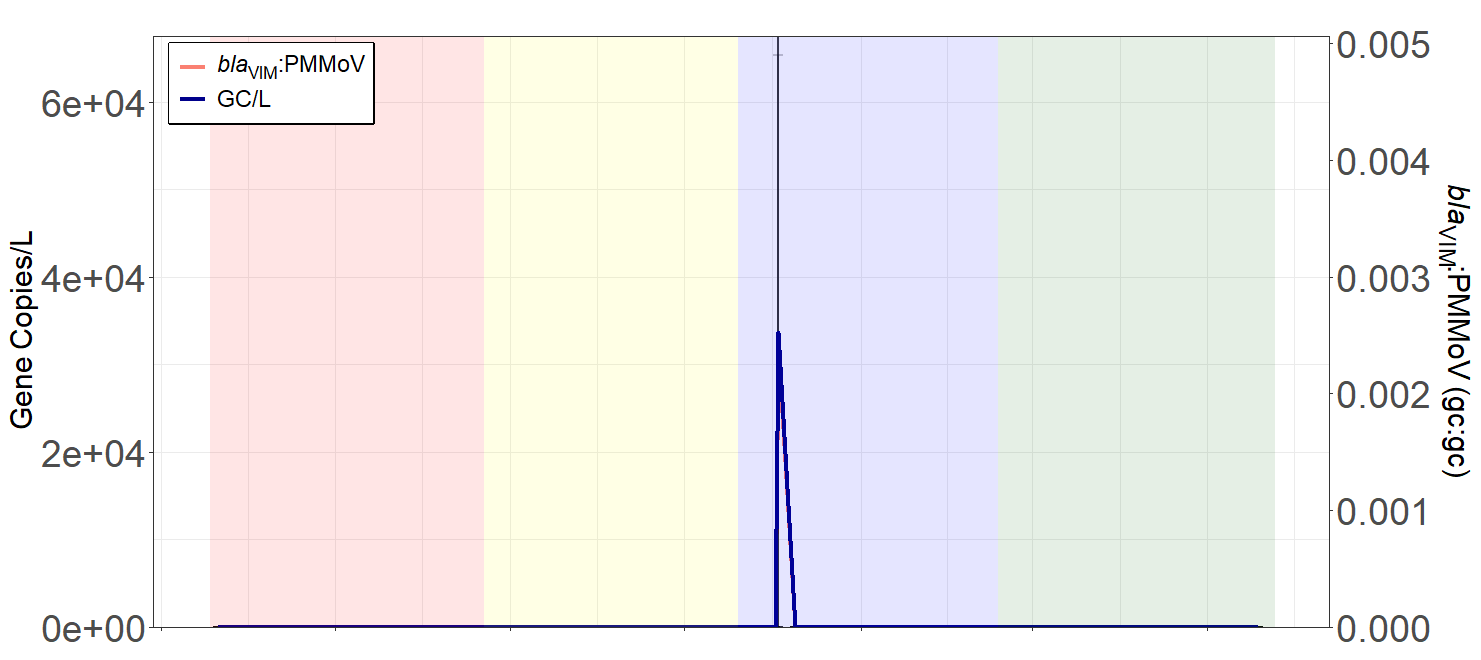


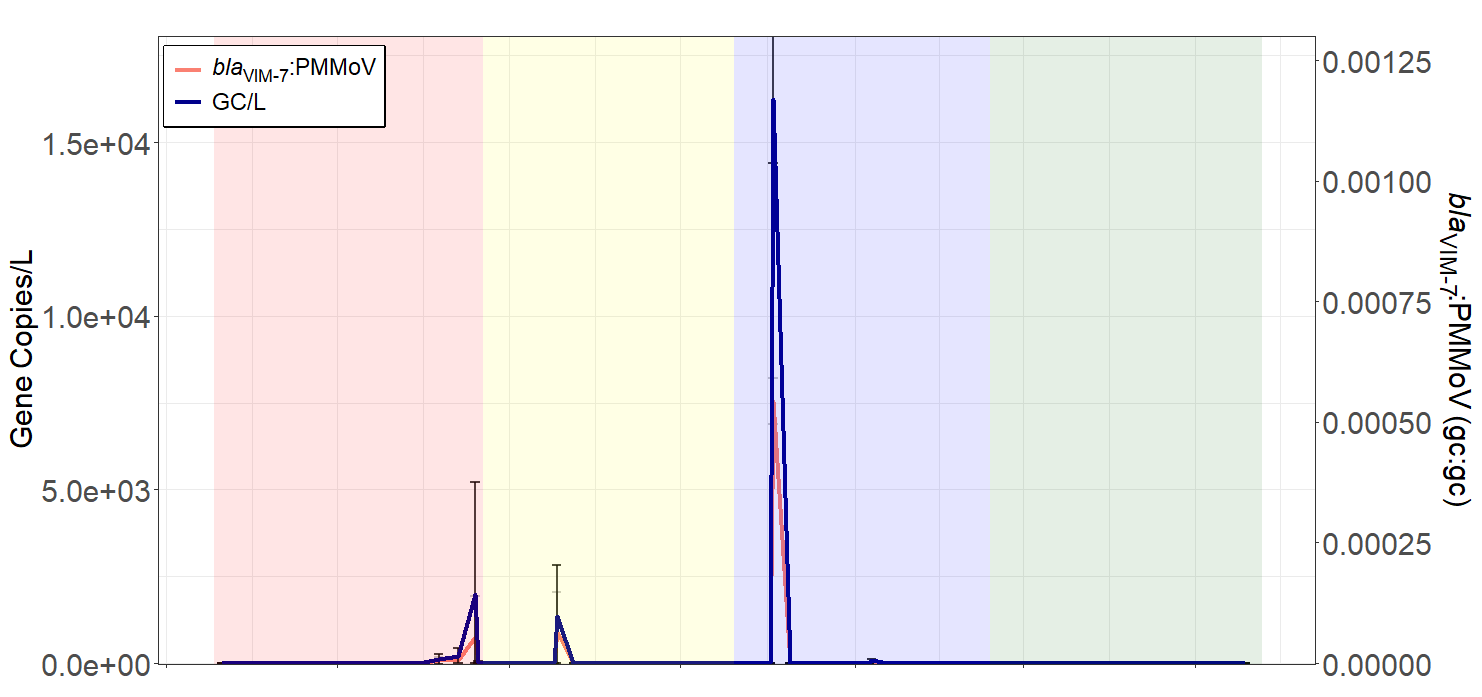


TB


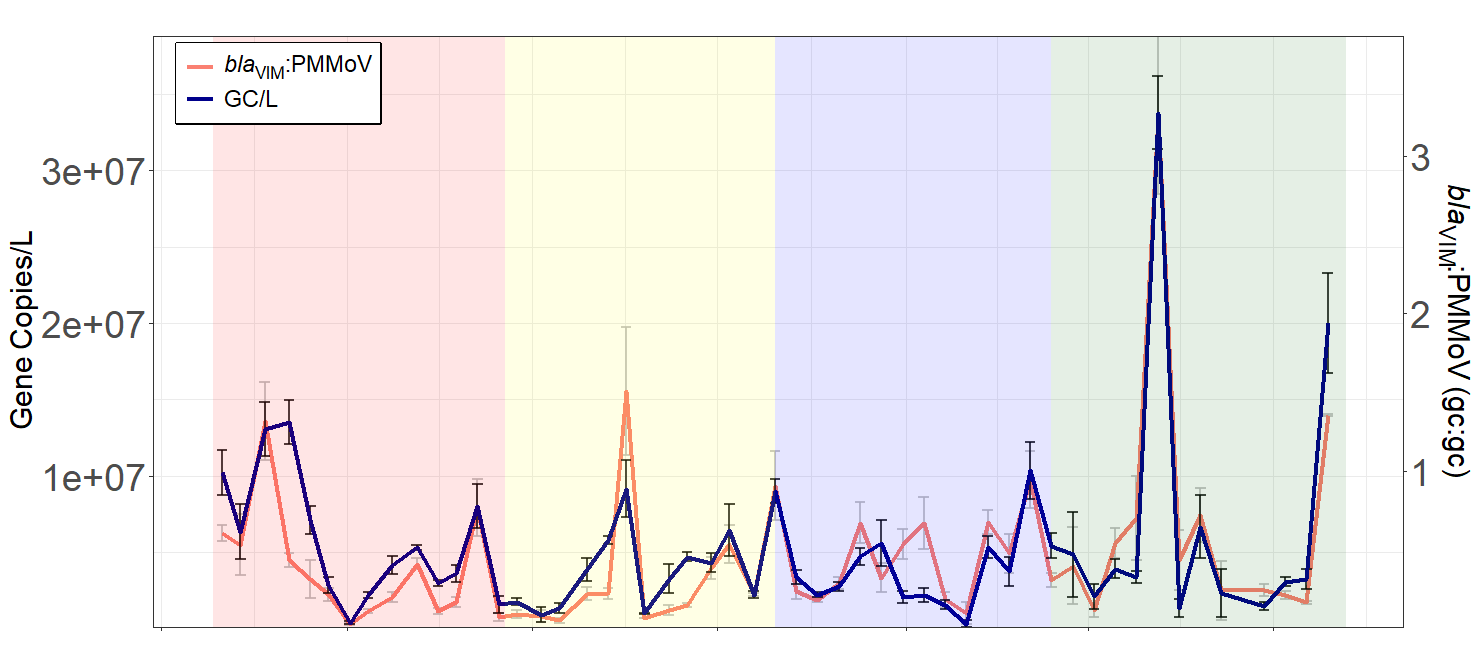


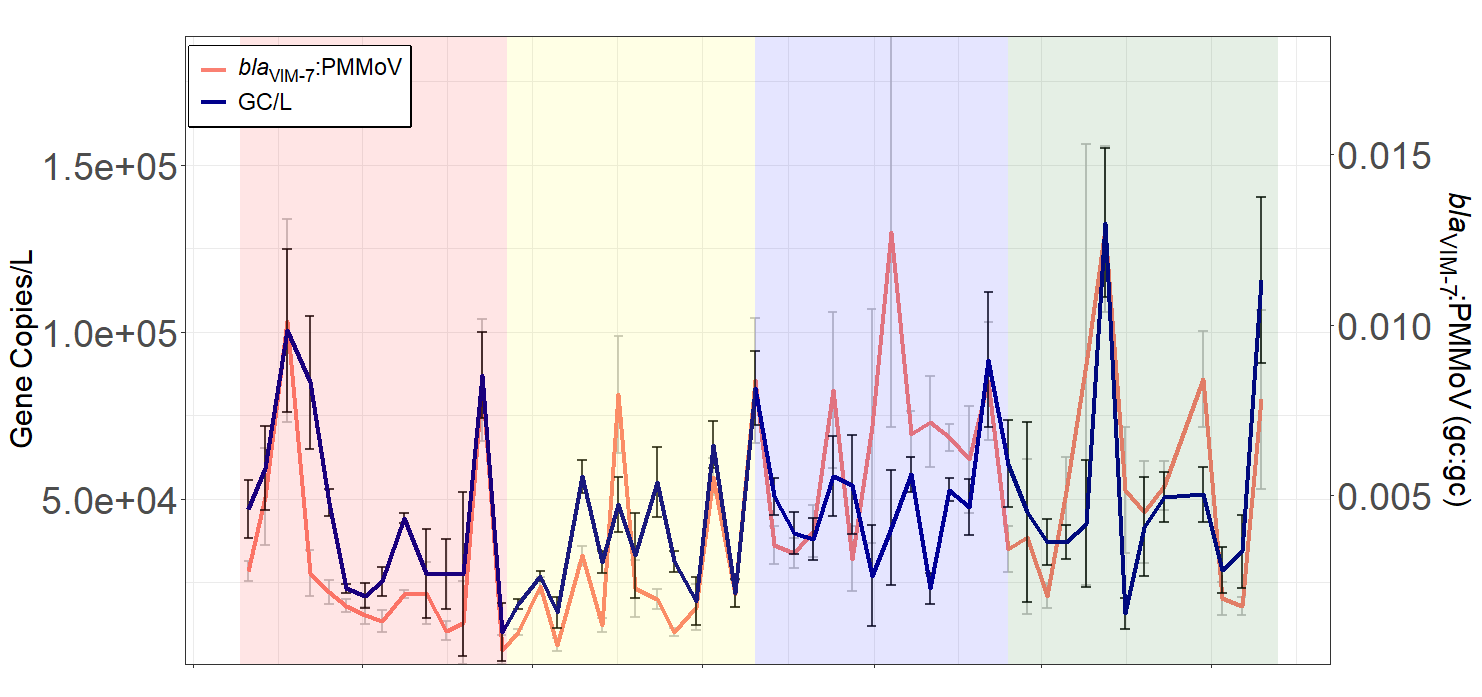


NIEA


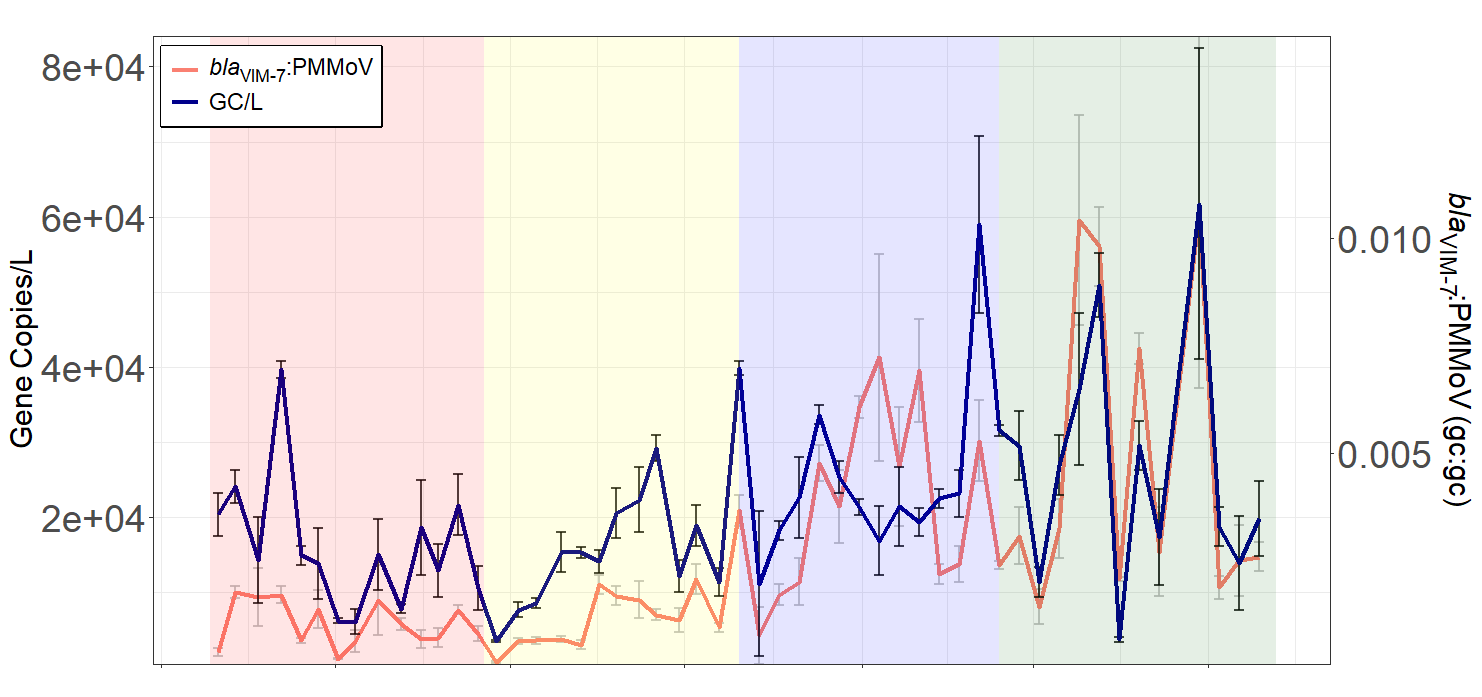

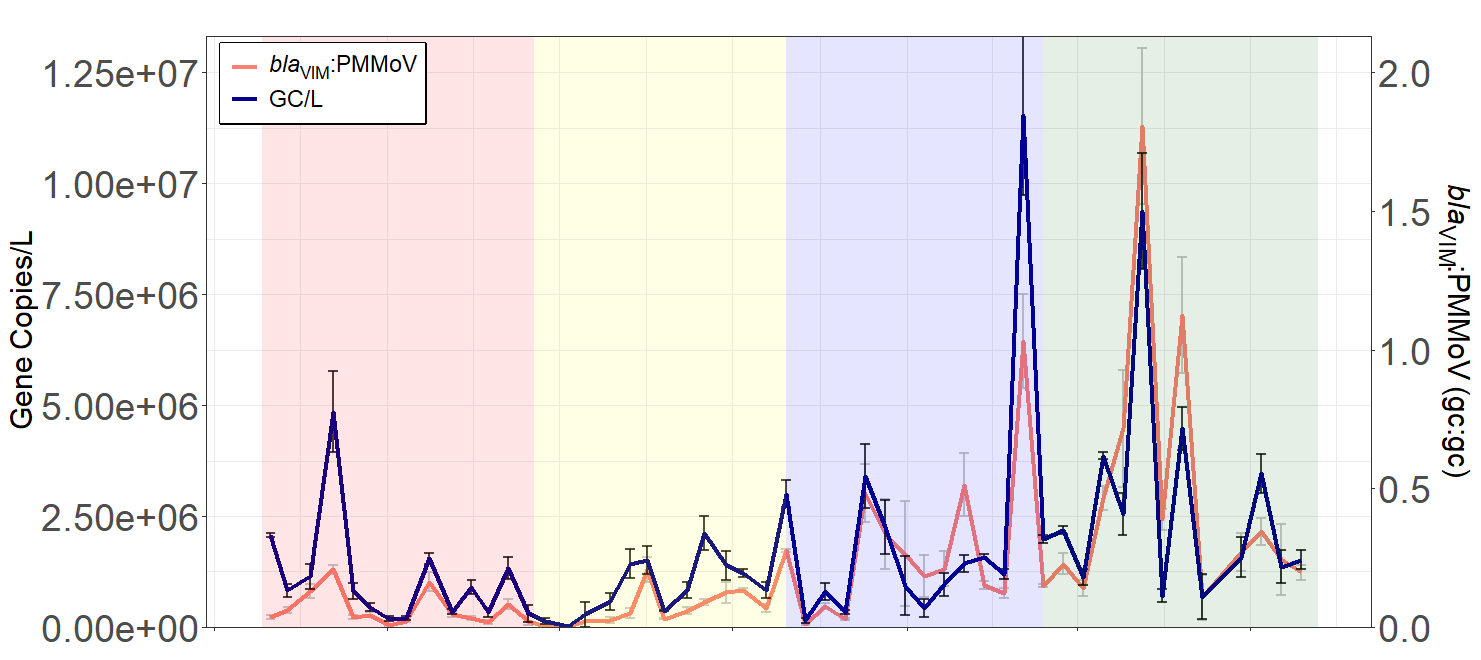


OAK


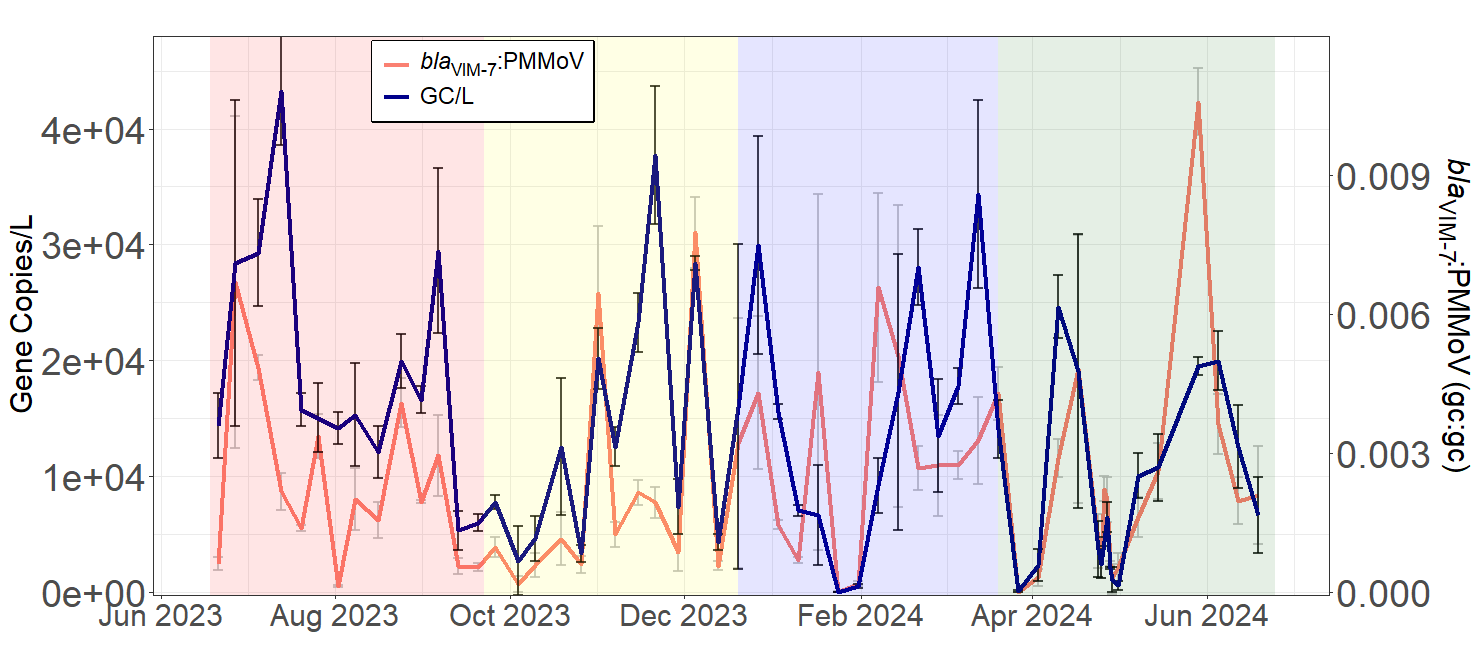

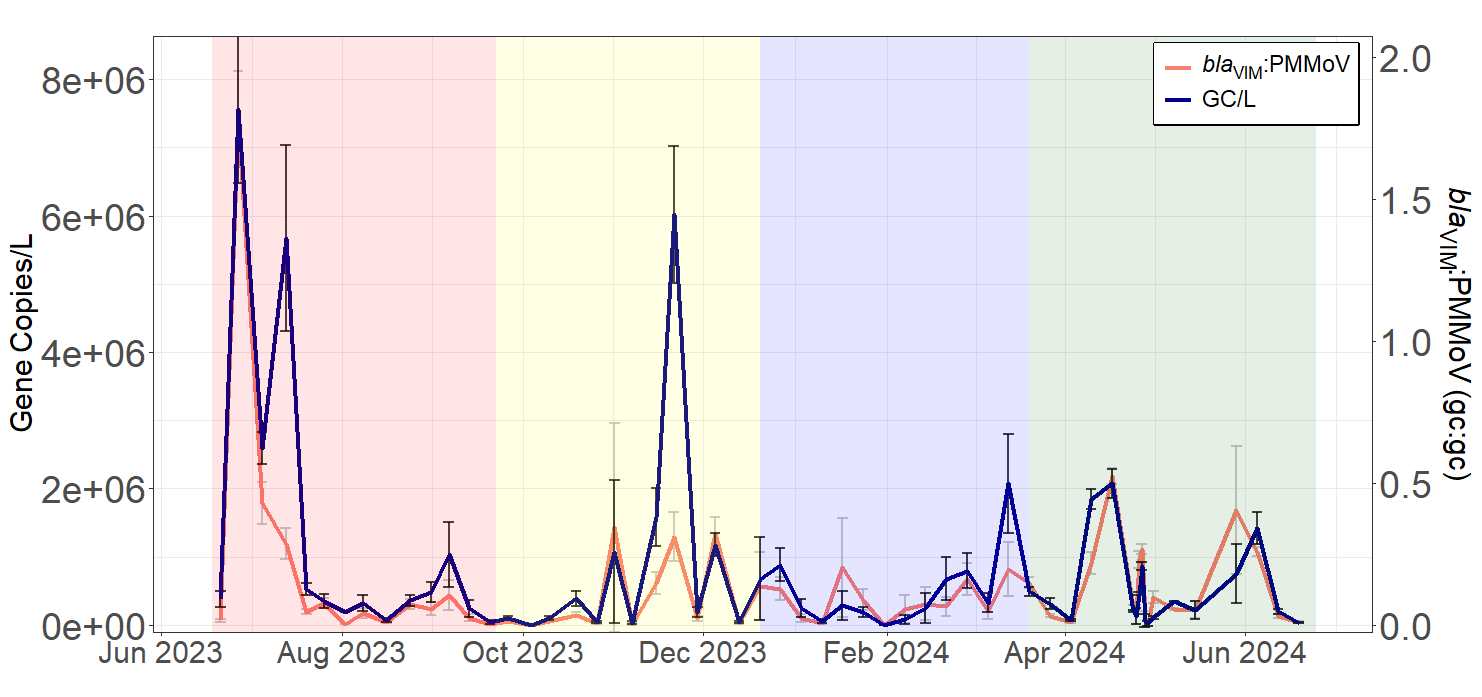


JEFF


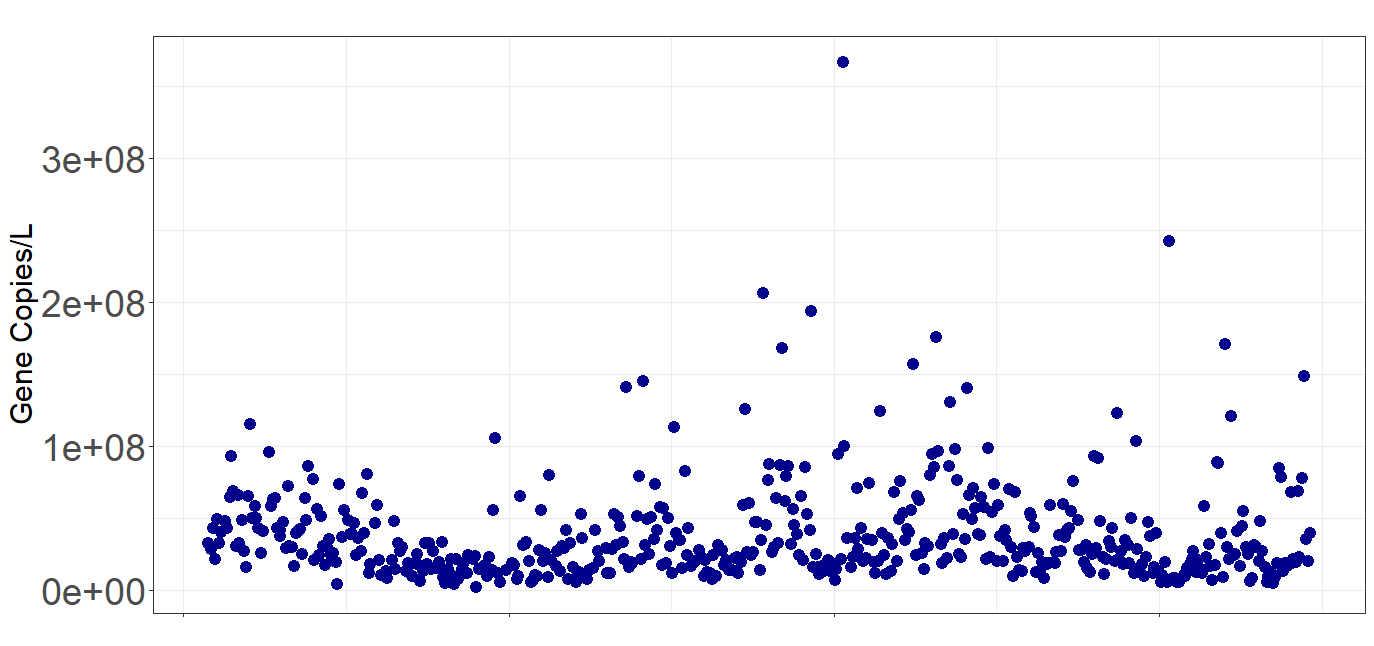

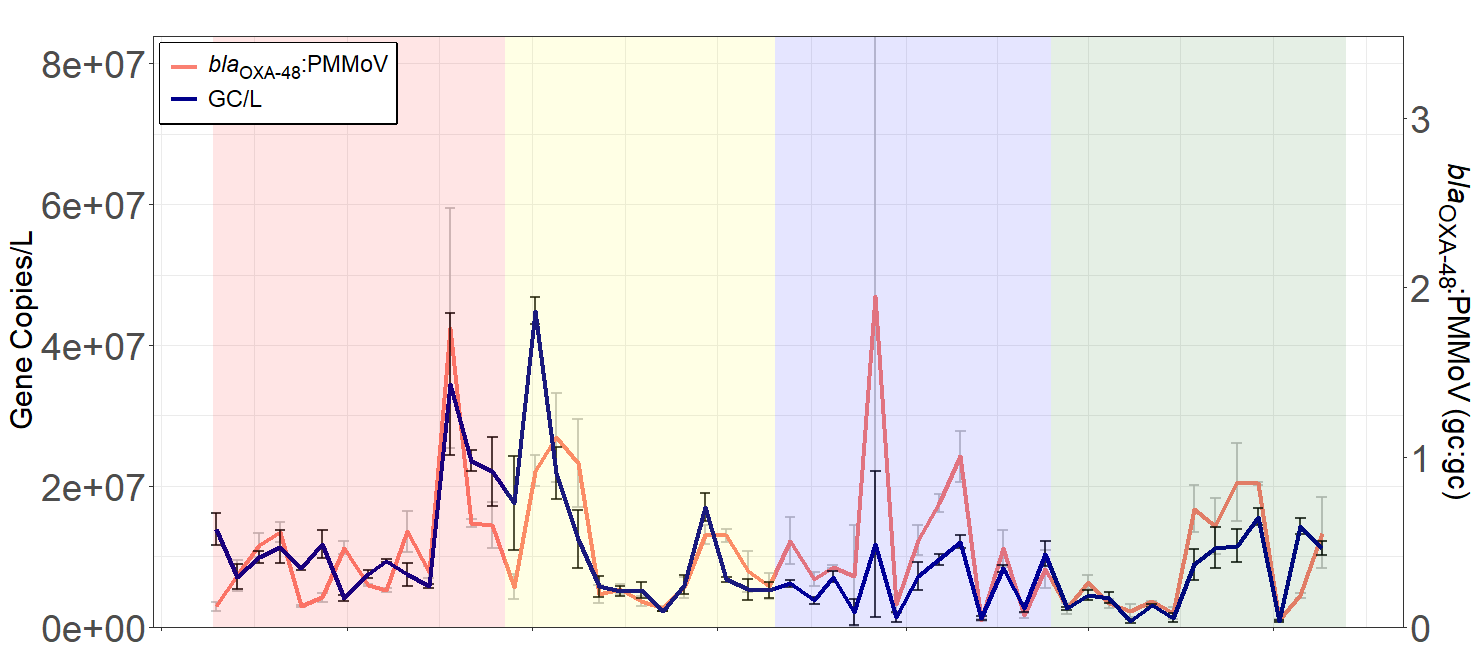
 *bla*OXA-48  PMMOV

LPCC


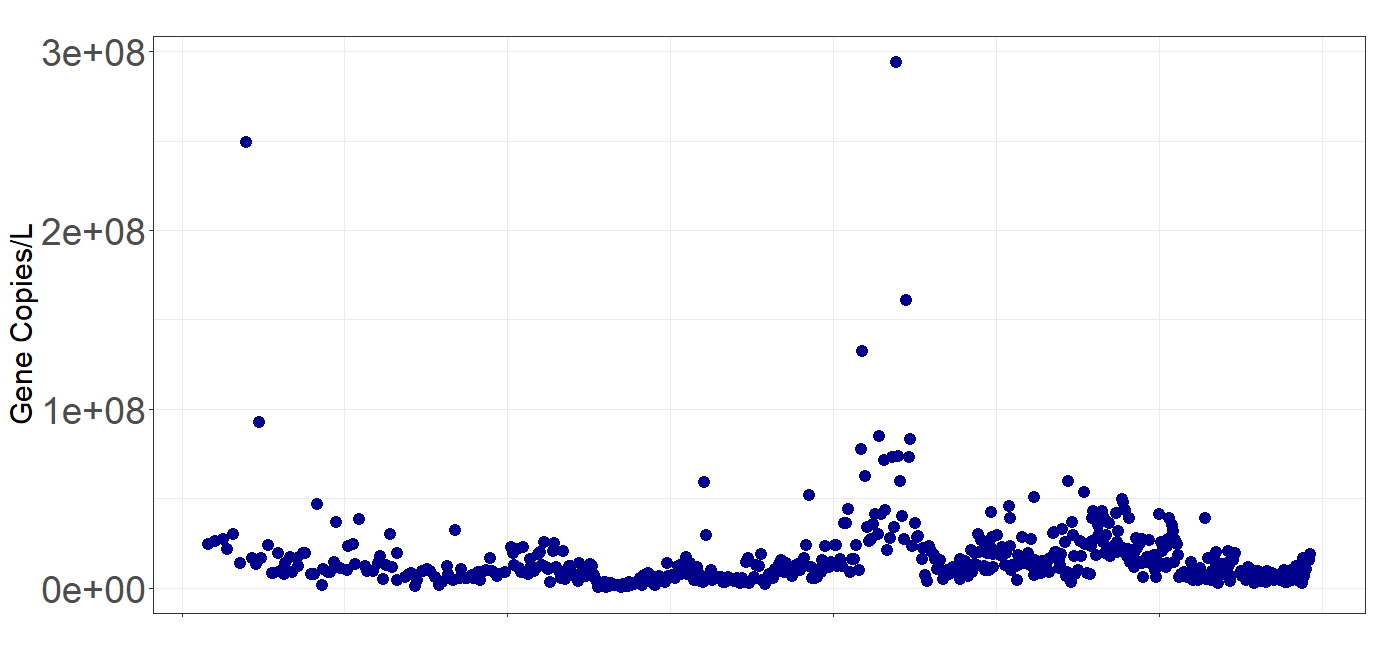

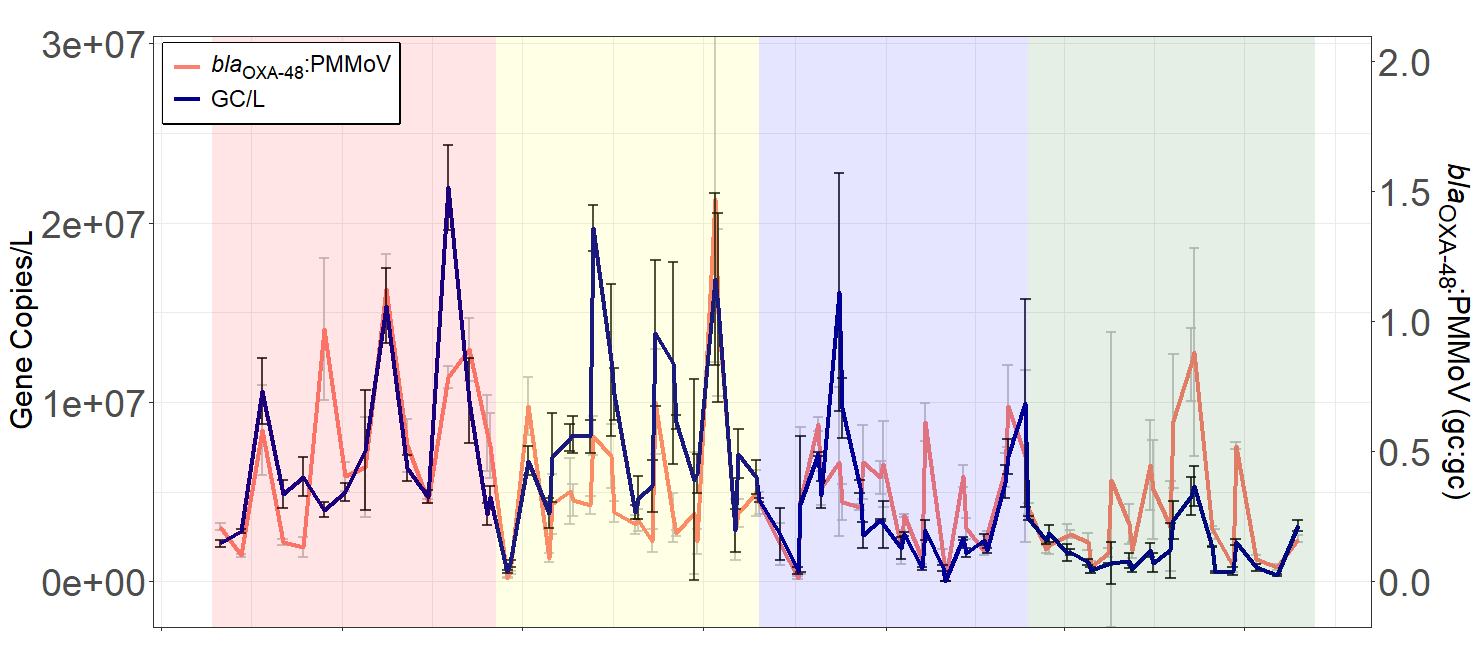


TB


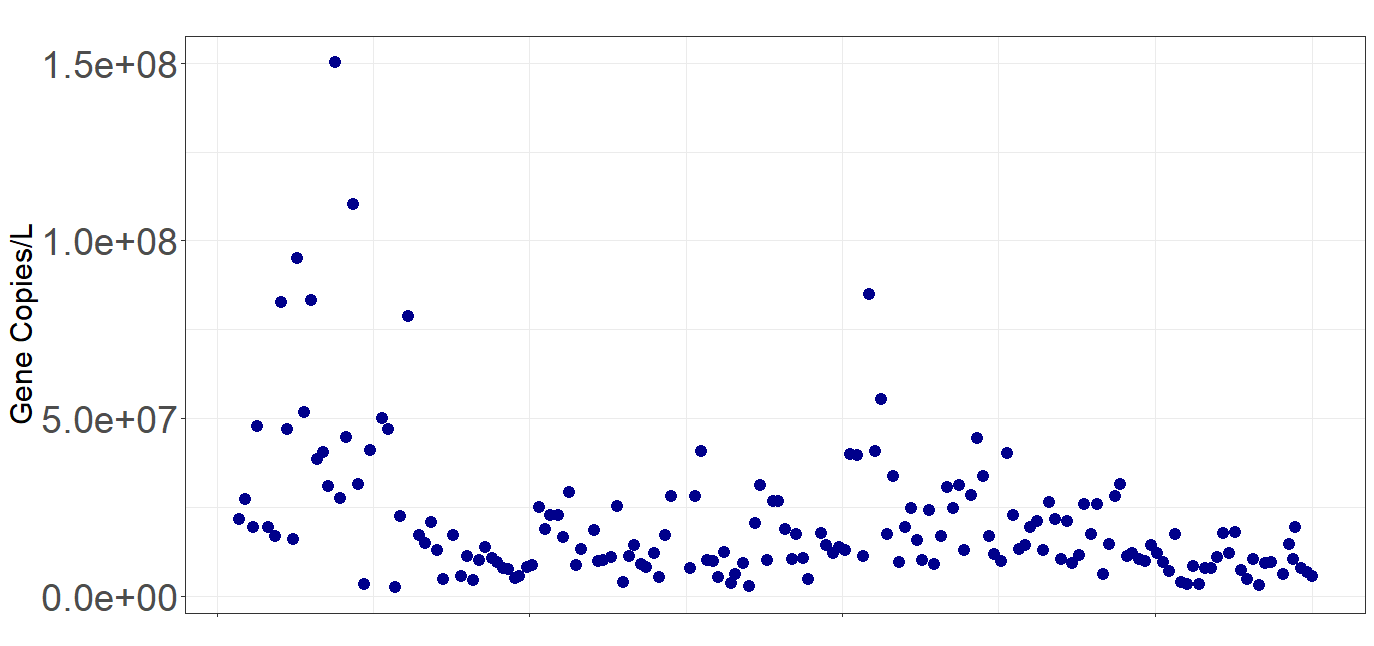

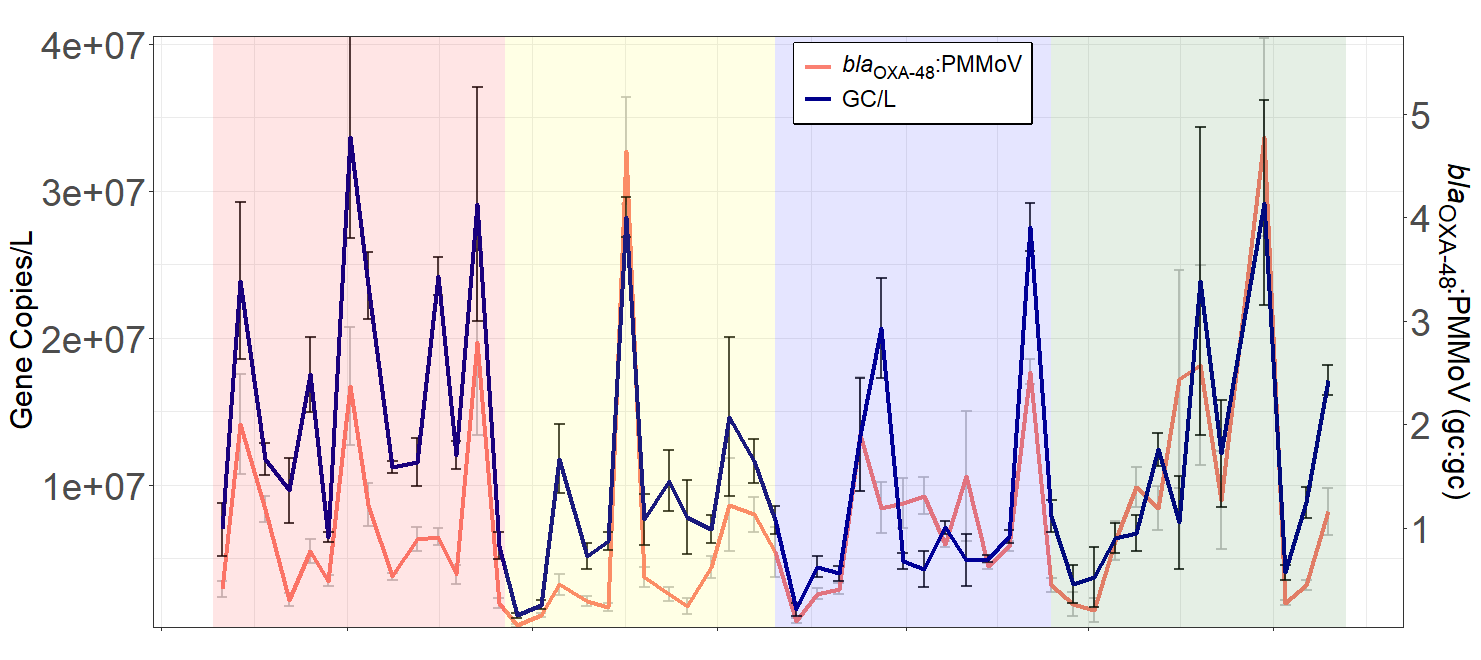


NIEA


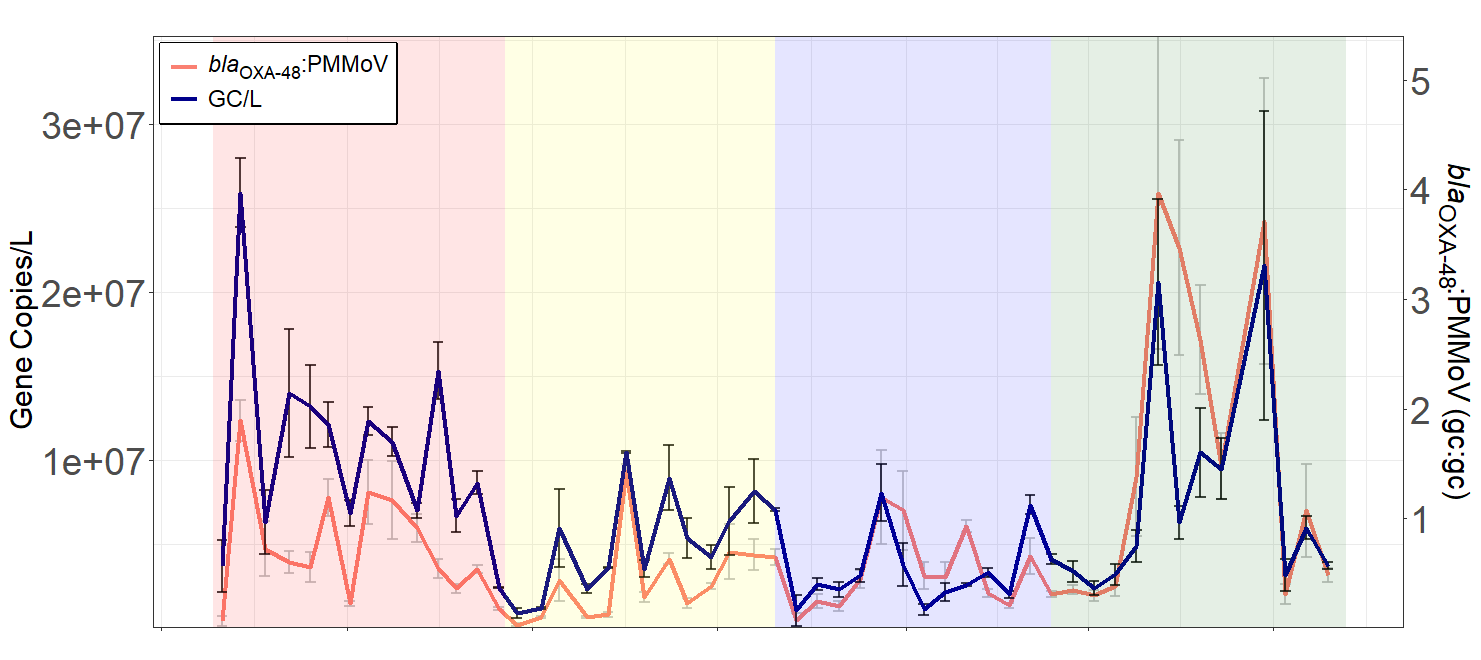


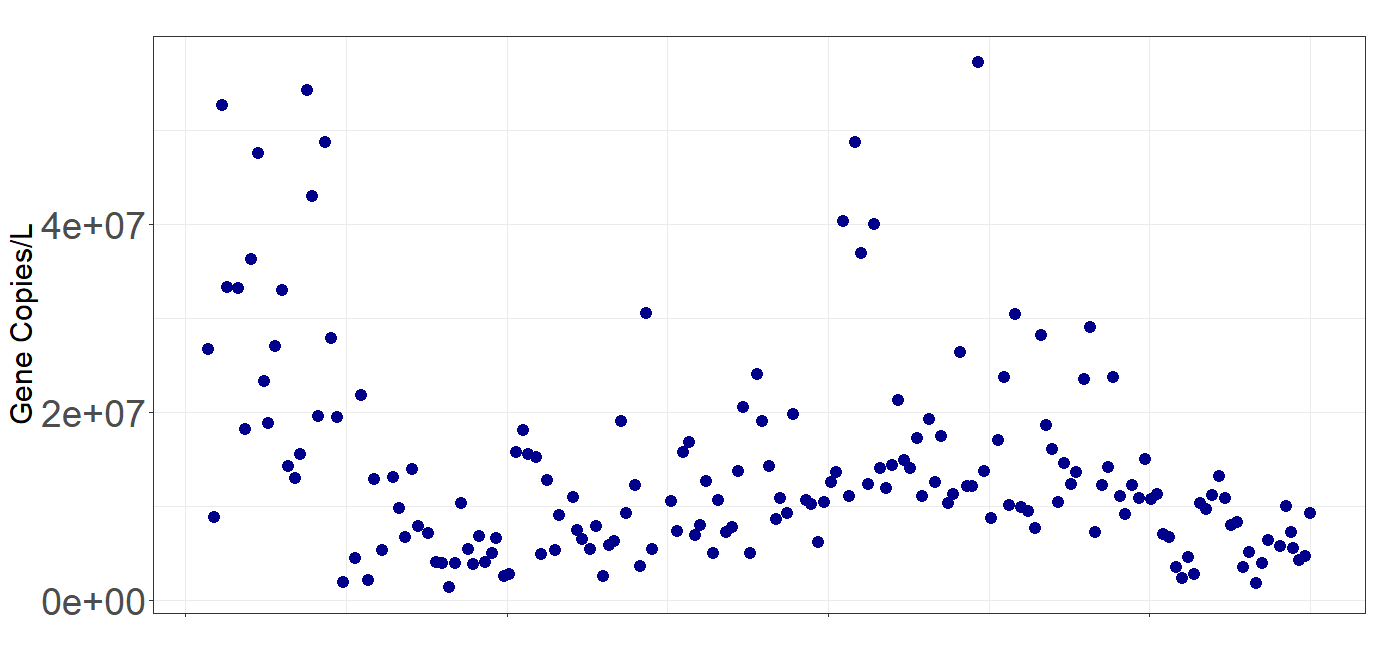


OAK


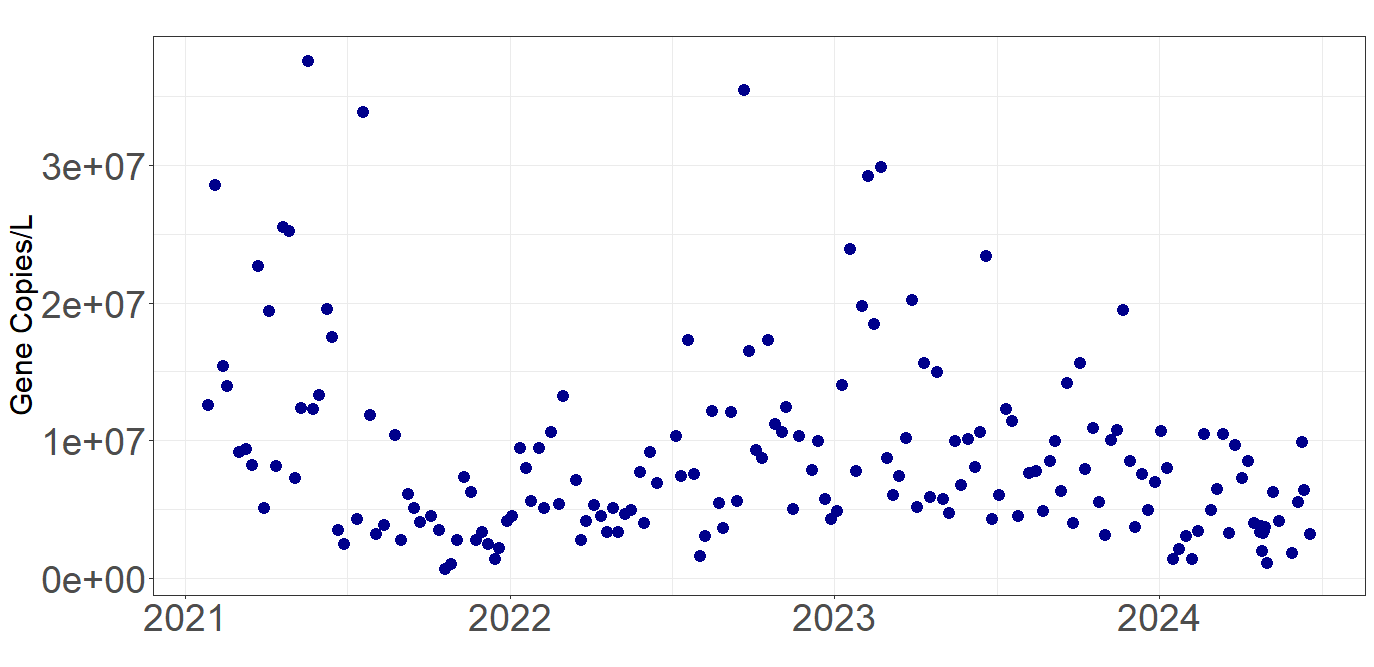

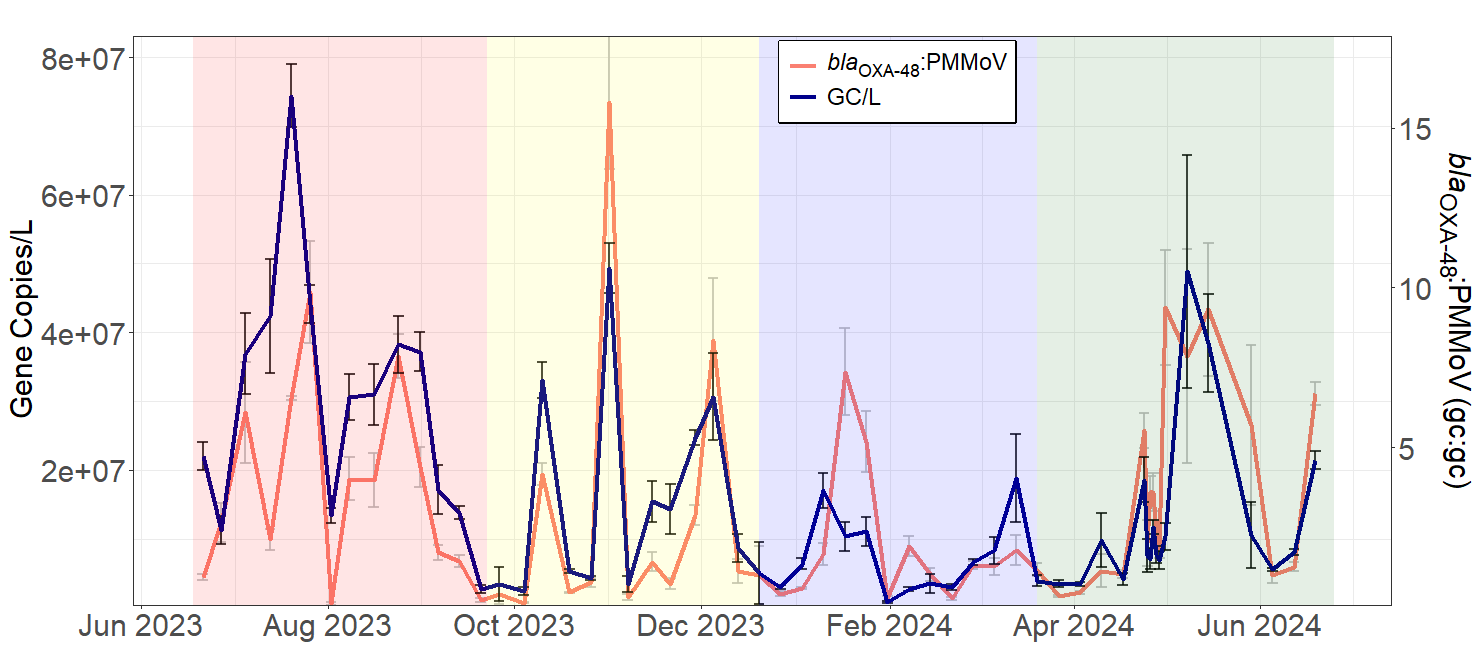


JEFF

**Figure S1** Time series of absolute concentration of antimicrobial resistance genes (ARGs, blue), PMMoV normalized ARGs (red), and scatter plots of PMMoV at each wastewater treatment plant (WWTP). Absolute concentration of ARGs was plotted as an average of technical triplicates. Normalized ARGs were plotted as an average of absolute concentration technical triplicates divided by the average of PMMoV technical triplicates. Error bars displayed in black (gene copies/L) and grey (normalized) reflect one standard deviation of the technical triplicates. PMMoV scatter plots range from January 2021 – June 2024. Points are an average of all technical replicates from that date. The point from August 2, 2023, was removed from the PMMoV plot at JEFF since it was an extreme outlier and caused portrayal of PMMoV at this WWTP to be inaccurate


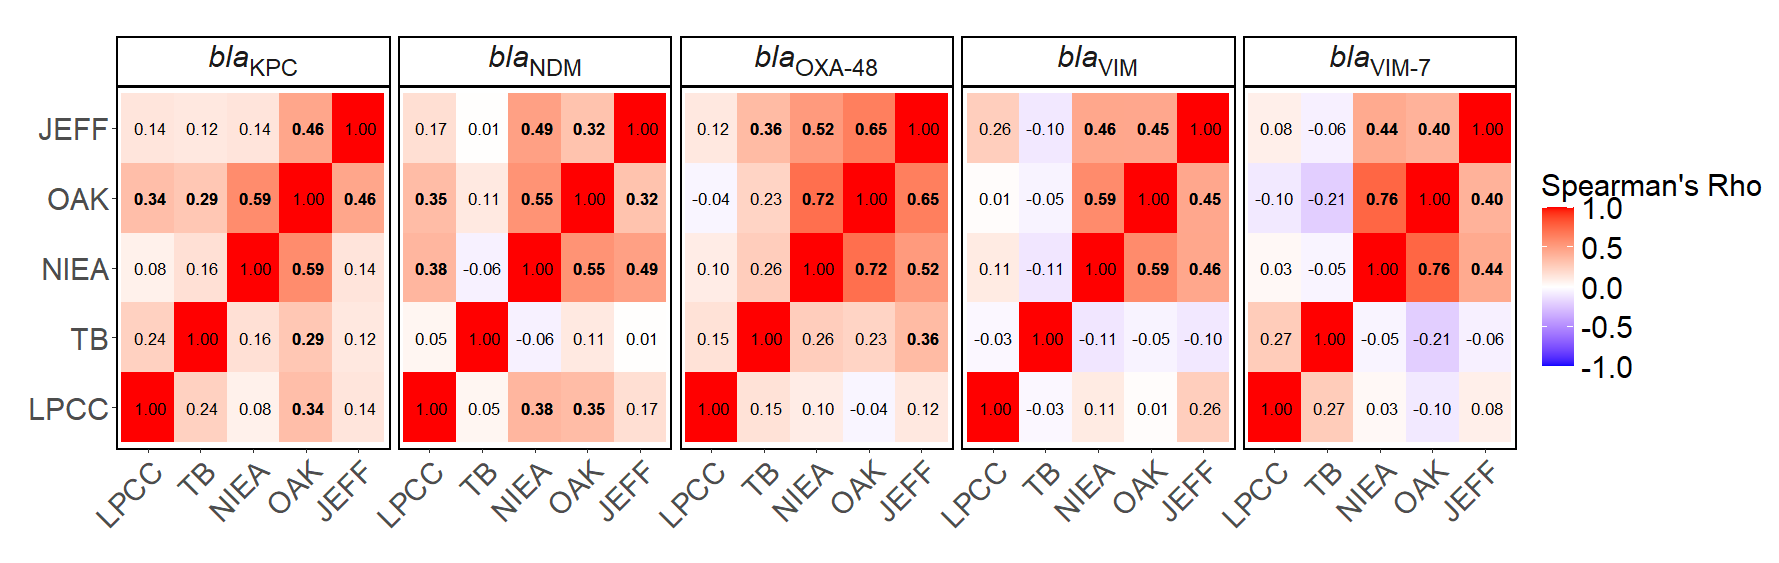


**Figure S2** Correlation of PMMoV normalized ARG concentrations between the five WWTPs. Normalized concentrations were averaged by week, then correlation was determined using Spearman’s ρ. No wastewater sample was collected from NIEA, OAK, or JEFF between May 19, 2024 – May 25, 2024, so this week was removed from correlation analyses involving these sites. Bolding represents correlations that were significant (p < 0.05)


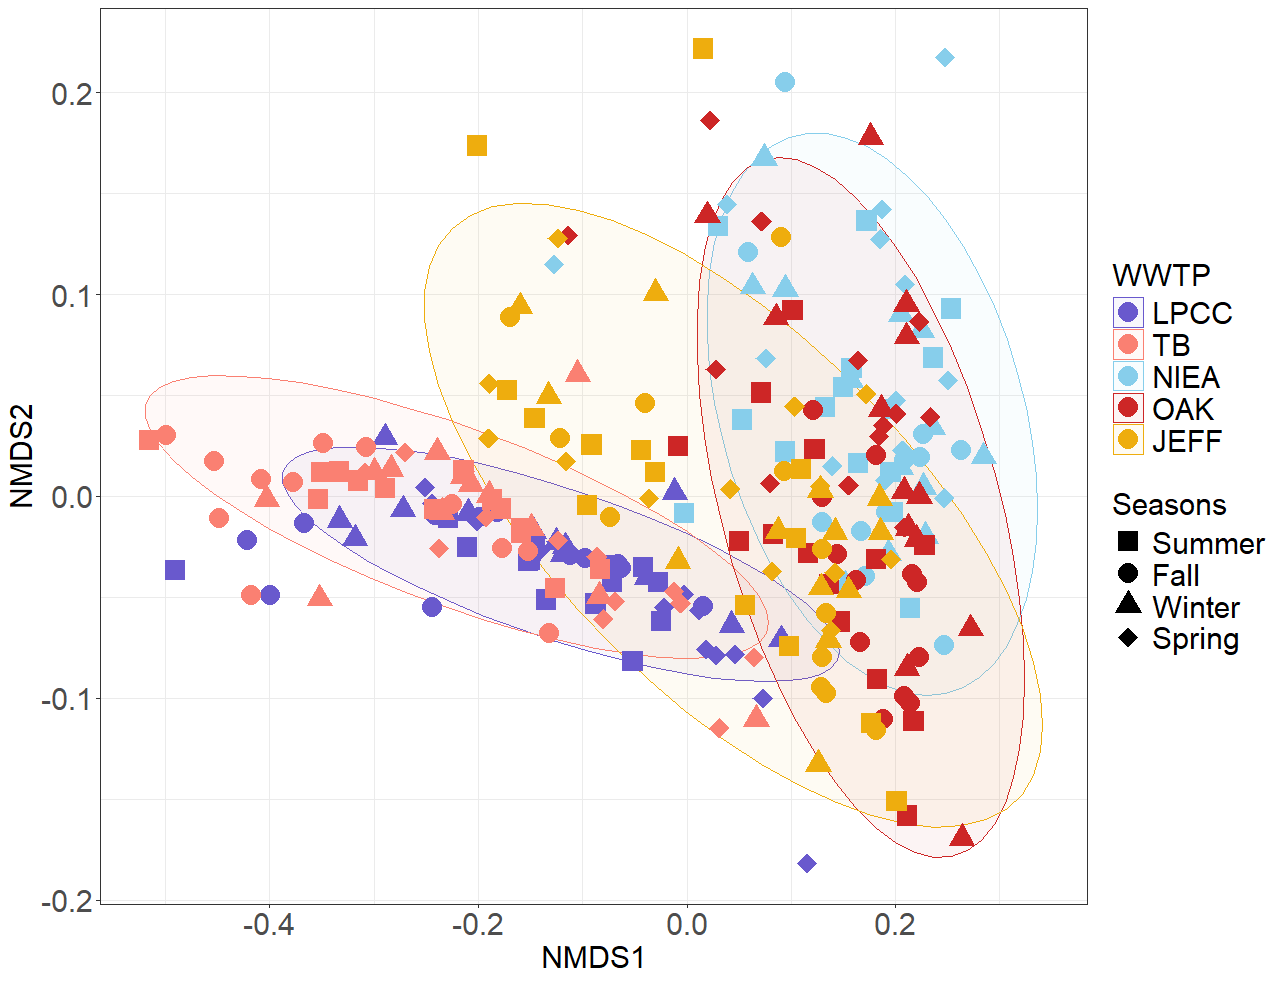


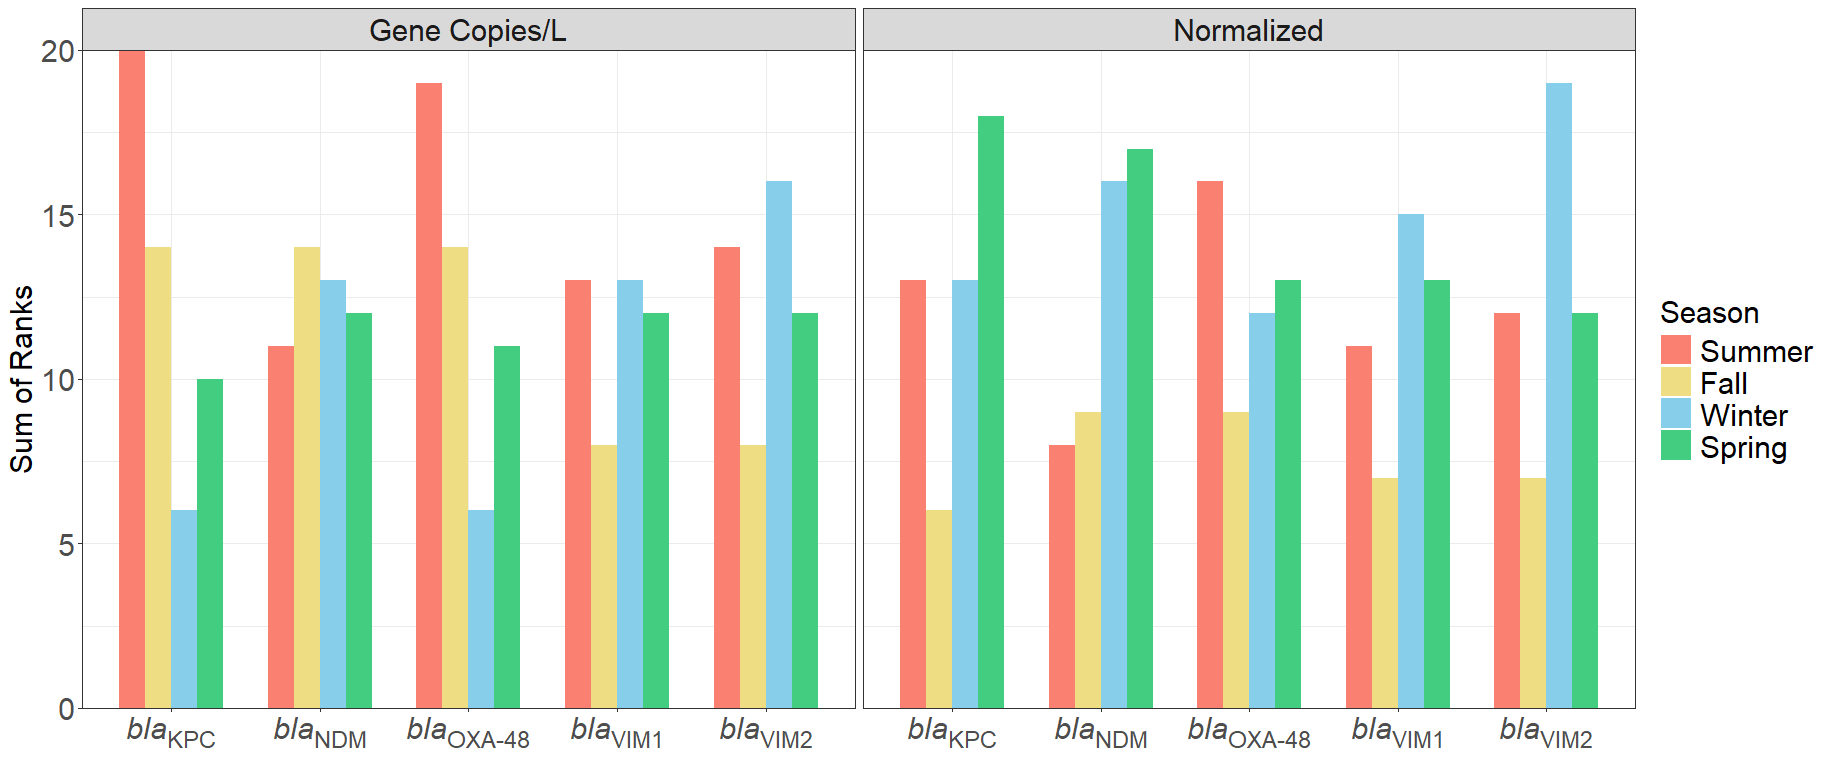
**Figure S3** Non-metric multidimensional scaling (NMDS) ordination plot of Bray-Curtis dissimilarity matrix from Hellinger transformed, PMMoV normalized ARG concentrations showing spatiotemporal differences in the resistome

**Figure S4** Seasonal averages of absolute ARG concentrations and PMMoV normalized ARG concentration were ranked at each WWTP with 4 being the highest concentration and 1 being the lowest. Ranks from the five WWTPs were summed for each target


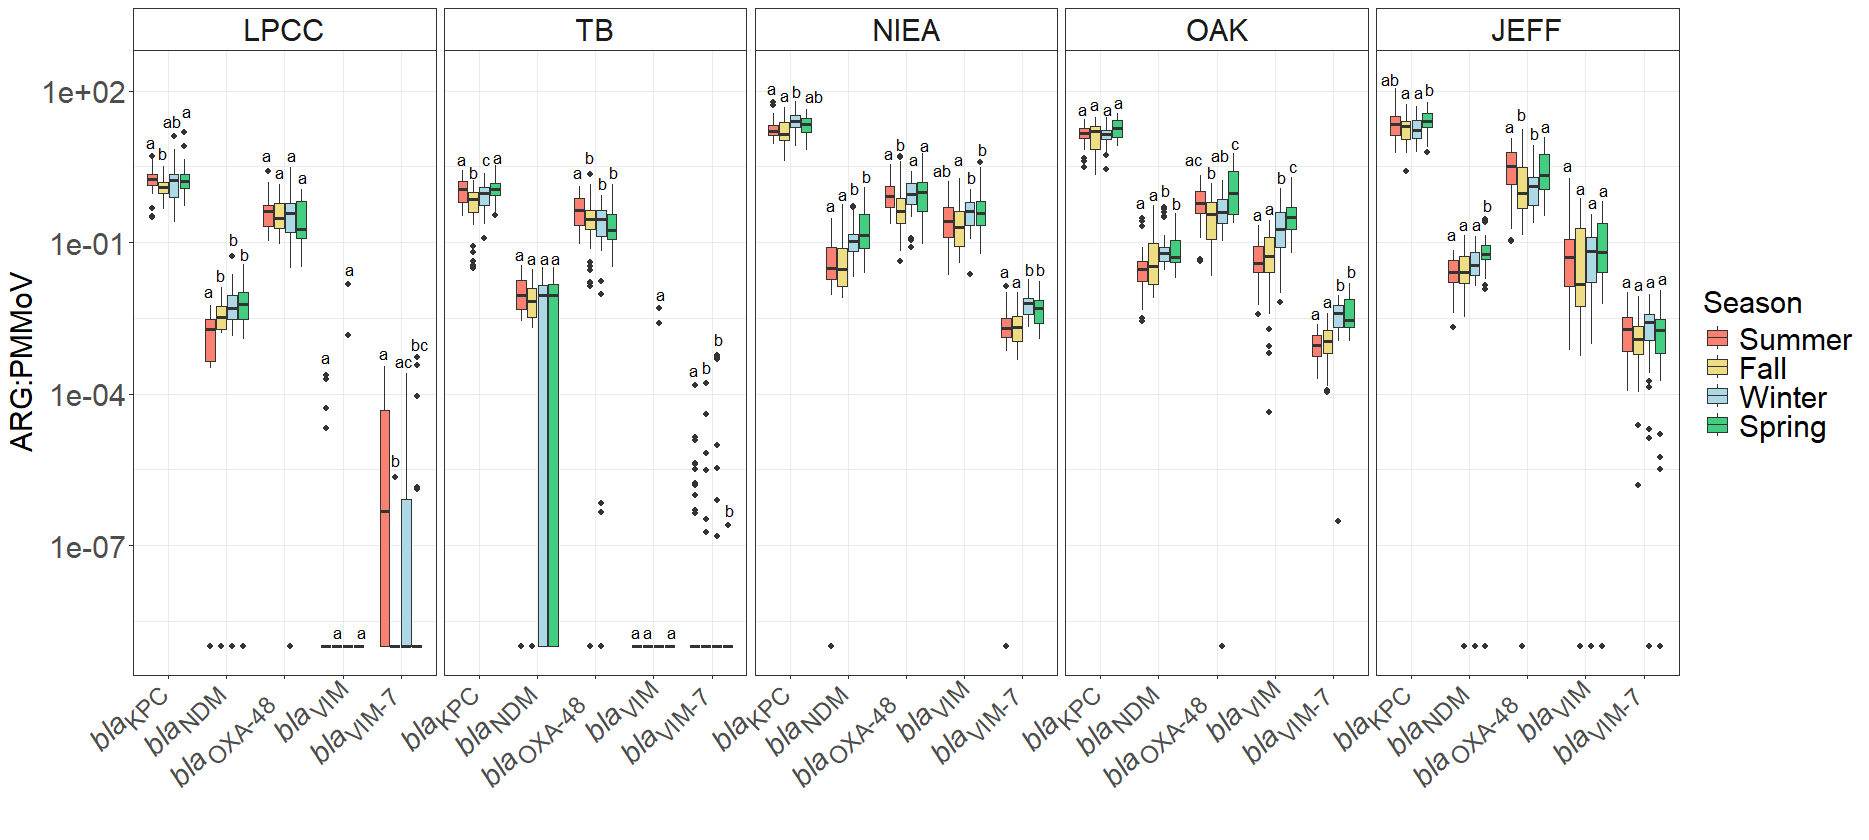


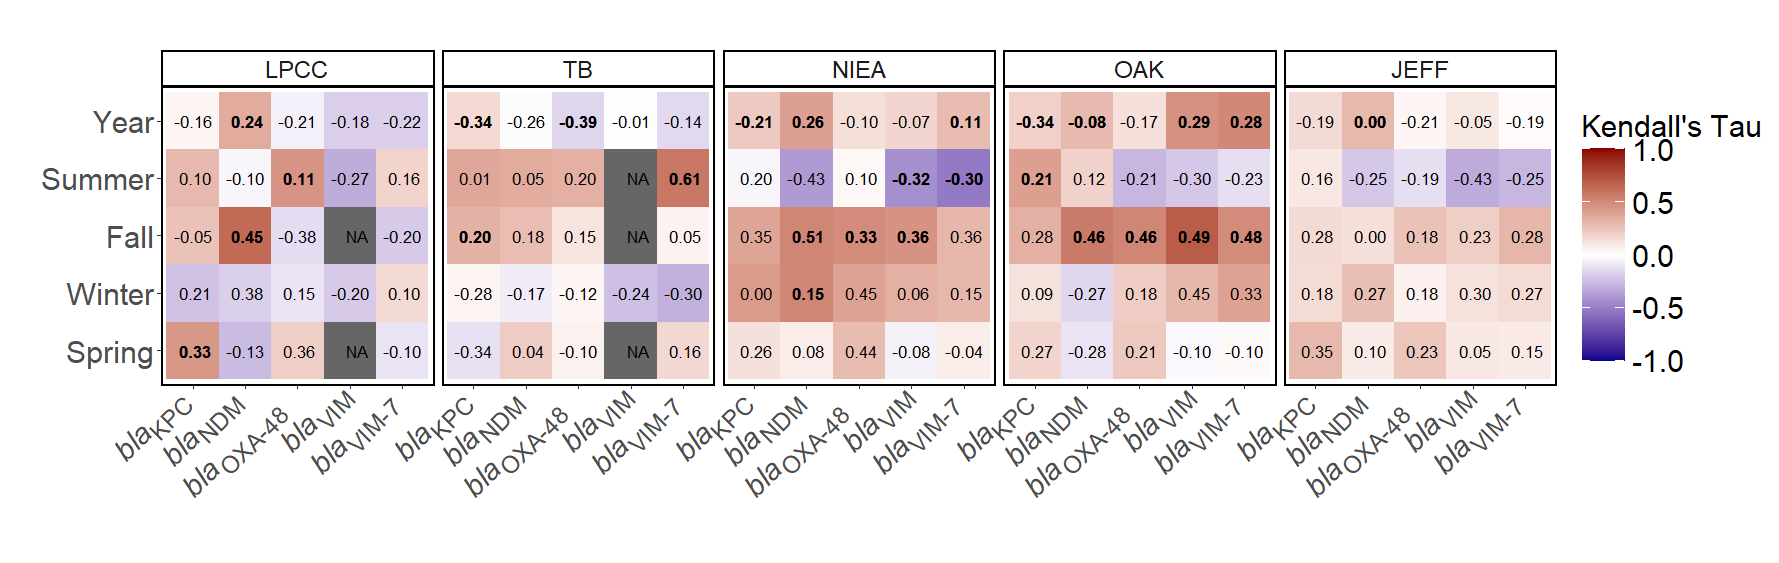
**Figure S5** Box plots of PMMoV normalized ARG concentrations separated by season and plotted on a log scale. Significant differences between seasons were determined using a Kruskal-Wallis test followed by a Dunn’s test with Holm-Bonferroni adjusted p-values. Seasons that do not share at least one letter were significantly different from each other (p < 0.05). Letters are relative to the four seasons for each ARG-WWTP combination

**Figure S6** Mann-Kendall test for monotonic trends in PMMoV normalized ARG concentrations for the entire sampling period and each season. Bolding represents a Kendall’s τ where the degree of the trend was significant (p < 0.05). Determination of Kendall’s τ for *bla*VIM1 in some seasons at TB and LPCC was not possible due to the lack of samples with a detectable signal


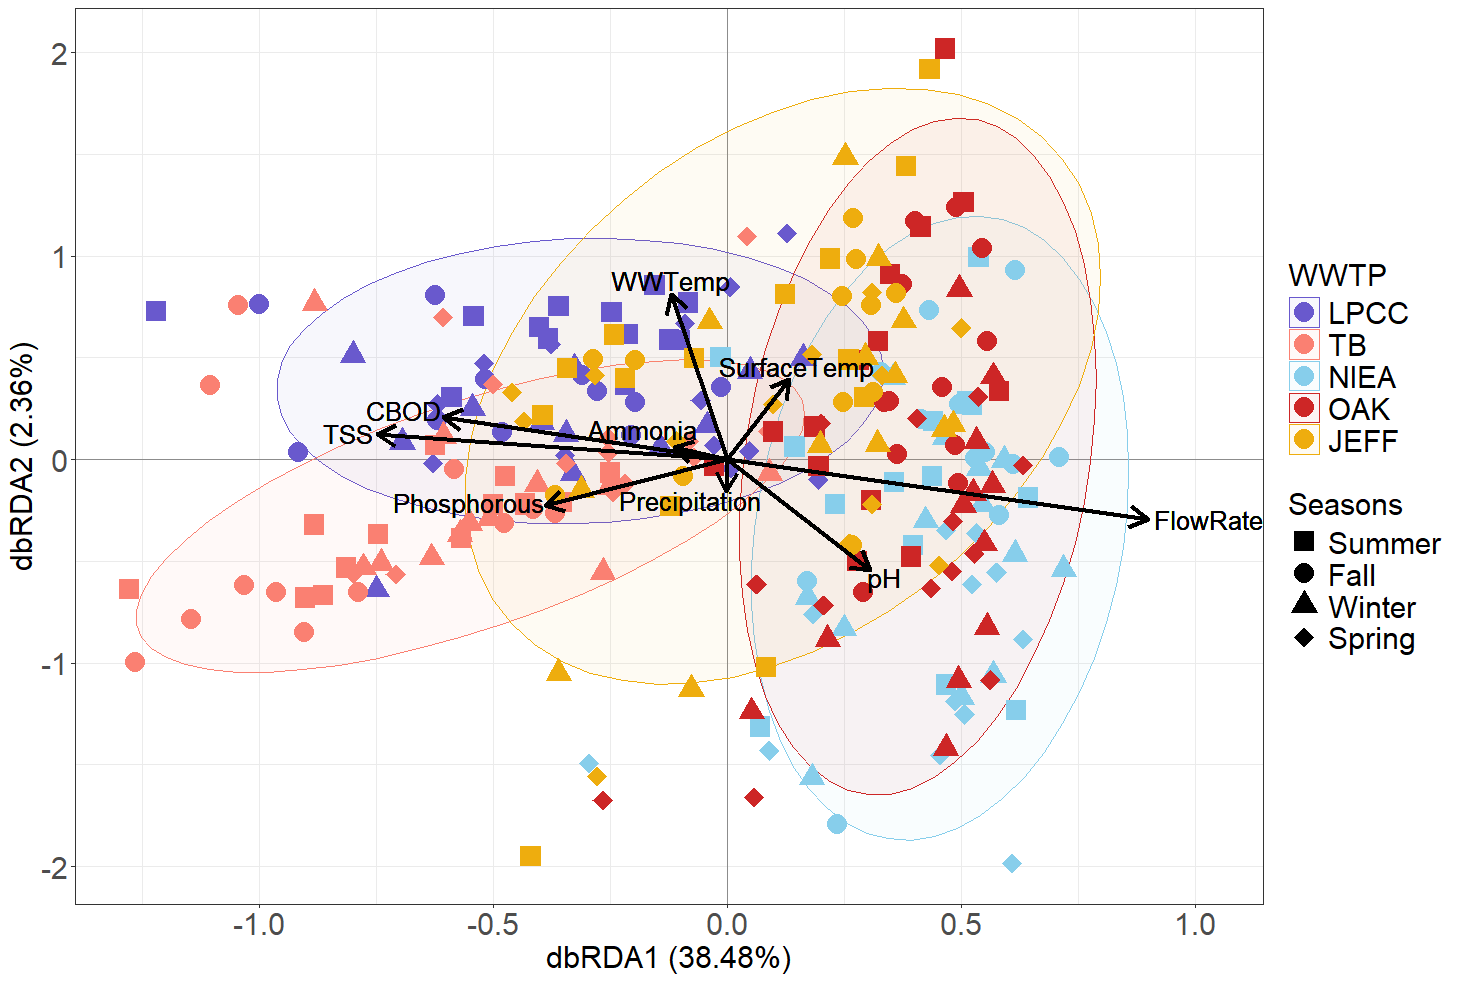


**Figure S7** Distance-based redundancy analysis (dbRDA) showing the explanatory effects of physiochemical and environmental factors onthe PMMoV normalized carbapenemase gene profile across WWTPs. No ammonia, CBOD, or phosphorous data were available at LPCC from June 26, 2023 – July 2, 2023, September 25, 2023 – October 1, 2023, or December 18, 2023 - December 24, 2023, respectively. No wastewater temperature data were available at TB from January 10, 2024 – January 16, 2024. For these sites, these weeks were removed from the dataset prior to dbRDA analysis


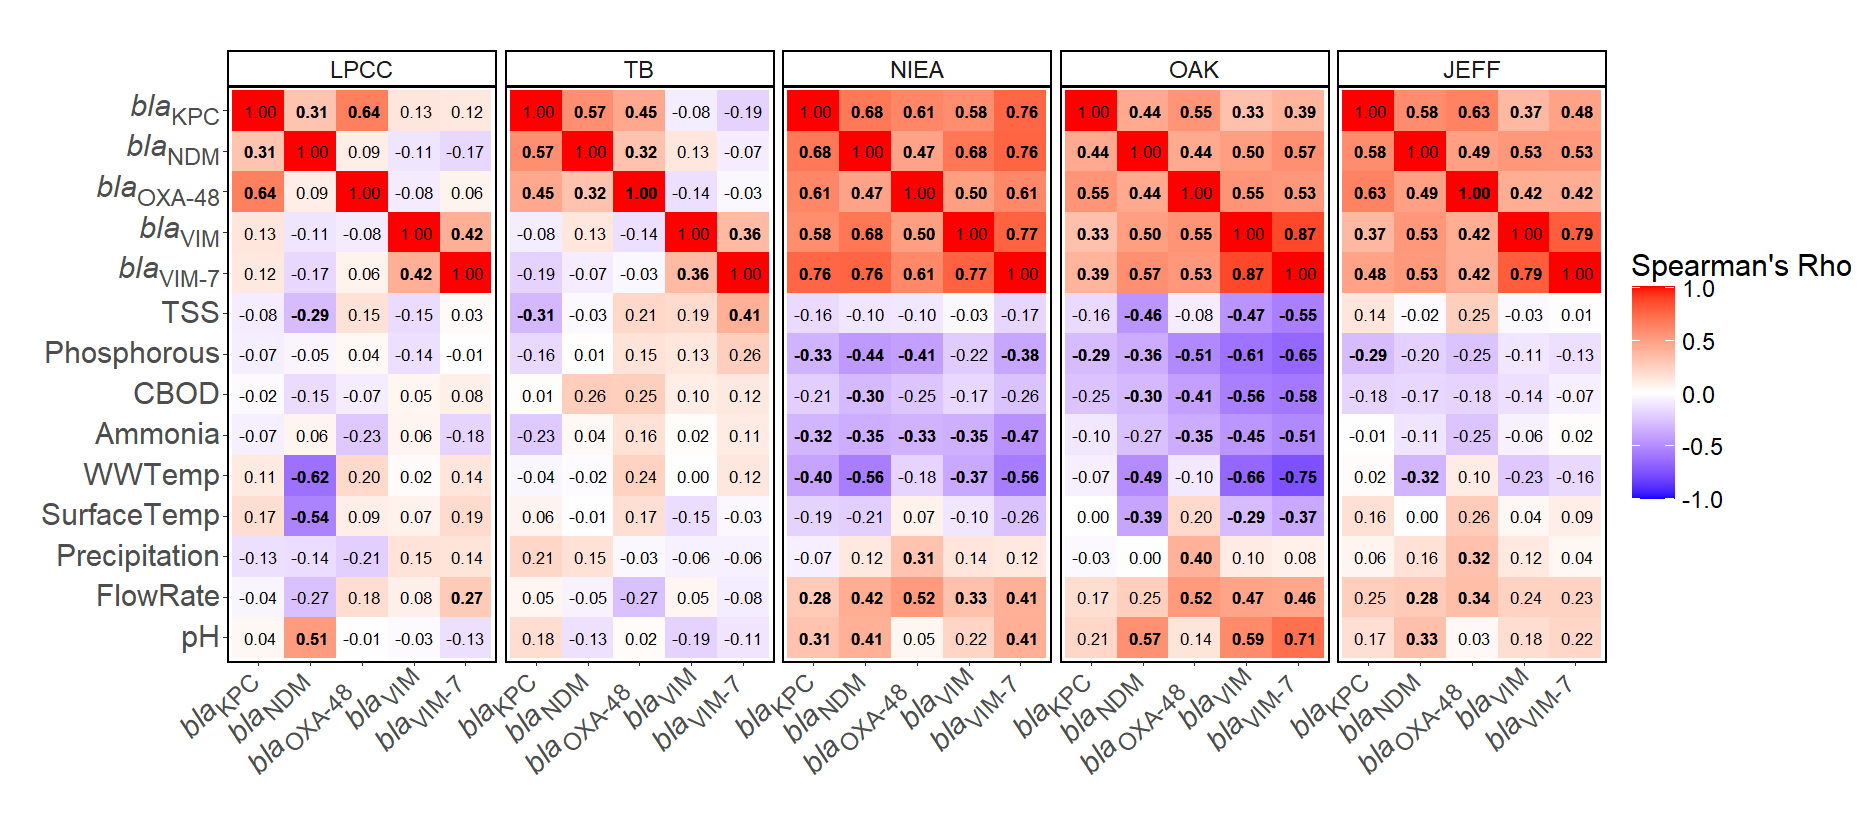


**Figure S8** Correlation matrix of PMMoV normalized ARG concentration and physiochemical and environmental factors at each WWTP. Spearman’s ρ was determined using weekly averages of variables. Bolding represents correlations that were significant (p < 0.05). Weeks with unavailable data (described previously) were removed from correlation analysis involving those PEFs or sites

**Table S1** G-block sequences used for standard curves.

| **Target** | **Sequence** |
| --- | --- |
| *bla*KPC | GCTGAGGAGCGCTTCCCACTGTGCAGCTCATTCAAGGGCTTTCTTGCTGCCGCTGTGCTGGCTCGCAGCCAGCAGCAGGCCGGCTTGCTGGACACACCCATCCGTTACGGCAAAAATGCGCTGGTTCCGTGGTCACCCATCTCGGAAAAATATCTGACAACAGGCATGACGGTGGCGGAGCTGTCCGCGGCCGCCGTGCAATACAGTGATAACGCCGCCGCCAATTTGTTGCTGAAGGAGTTGGGCGGCCCGGCCGGGCTGACGGCCTTCATGCGCTCTATCGGCGATACCACGTTAATTAT |
| *bla*NDM | TGAAATCCGCCCGACGATTGGCCAGCAAATGGAAACTGGCGACCAACGGTTTGGCGATCTGGTTTTCCGCCAGCTCGCACCGAATGTCTGGCAGCACACTTCCTATCTCGACATGCCGGGTTTCGGGGCAGTCGCTTCCAACGGTTTGATCGTCAGGGATGGCGGCCGCGTGCTGGTGGTCGATACCGCCTGGACCGATGACCAGACCGCCCAGATCCTCAACTGGATCAAGCAGGAGATCAACCTGCCGGTCGCGCTGGCGGTGGTGACTCACGCGCATCAGGACAAGATGGGCGGTATGGACGCGCTGCAT |
| *bla*OXA-48 | CAGCAAGGATTTACCAATAATCTTAAACGGGCGAACCAAGCATTTTTACCCGCATCTACCTTTAAAATTCCCAATAGCTTGATCGCCCTCGATTTGGGCGTGGTTAAGGATGAACACCAAGTCTTTAAGT GGGATGGACA |
| *bla*VIM | GATGGTGATGAGTTGCTTTTGATTGATACAGCGTGGGGTGCGAAAAACACAGCGGCACTTCTCGCGGAGATTGAAAAGCAAATTGGACTTCCCGTAACGCGTGCAGTCTCCACGCACTTTCATGACGACCGCGTCGGCGGCGTTGATGTCCTTCGGGCGGCTGGGGTGGCAACGTACGCATCACCGTCGACACGCCGGCT |
| *bla*VIM-7 | CGATGCTGATGAGTTGCTTCTTATTGATACAGCGTGGGGGGCGAAGAACACGGTAGCCCTTCTCGCGGAGATTGAAAAGCAAATTGGACTTCCAGTAACGCGCTCAATTTCTACGCACTTCCATGACGATCGAGTCGGTGGAGTTGATGTCCTCCGGGCGGCTGGAGTGGCAACGTACACCTCACCCTTGACACGCCAGC |
| PMMoV | GGTGGCAGCAAAGGTAATGGTAGCTGTGGTTTCAAATGAGAGTGGTTTGACCTTAACGTTTGAGAGGCCTACCGAAGCAAATGTCGCACTTGCATTGCAACCGACAATTACATCAAAGGAGGAAGGTTCGTTGAAGATTGAAATGTCTGA |

|  |  | **Absolute Concentration** | | | | | **PMMoV Normalized** | | | | |
| --- | --- | --- | --- | --- | --- | --- | --- | --- | --- | --- | --- |
|  |  | **LPCC** | **TB** | **NIEA** | **OAK** | **JEFF** | **LPCC** | **TB** | **NIEA** | **OAK** | **JEFF** |
| *bla*KPC | LPCC | *1* | 0.083 | **0.282** | 0.271 | 0.067 | *1* | 0.243 | 0.075 | **0.338** | 0.136 |
|  | TB | 0.083 | *1* | **0.321** | **0.466** | **0.321** | 0.243 | *1* | 0.161 | **0.294** | 0.120 |
|  | NIEA | **0.282** | **0.321** | *1* | **0.713** | **0.497** | 0.075 | 0.161 | *1* | **0.587** | 0.139 |
|  | OAK | 0.271 | **0.466** | **0.713** | *1* | **0.642** | **0.338** | **0.294** | **0.587** | *1* | **0.460** |
|  | JEFF | 0.067 | **0.321** | **0.497** | **0.642** | *1* | 0.136 | 0.120 | 0.139 | **0.460** | *1* |
| *bla*NDM | LPCC | *1* | -0.088 | **0.278** | 0.082 | -0.039 | *1* | 0.048 | **0.379** | **0.348** | 0.169 |
|  | TB | -0.088 | *1* | -0.068 | 0.130 | 0.063 | 0.048 | *1* | -0.060 | 0.115 | 0.008 |
|  | NIEA | **0.278** | -0.068 | *1* | **0.334** | **0.382** | **0.379** | -0.060 | *1* | **0.553** | **0.491** |
|  | OAK | 0.082 | 0.130 | **0.334** | *1* | 0.096 | **0.348** | 0.115 | **0.553** | *1* | **0.315** |
|  | JEFF | -0.039 | 0.063 | **0.382** | 0.096 | *1* | 0.169 | 0.008 | **0.491** | **0.315** | *1* |
| *bla*OXA-48 | LPCC | *1* | 0.110 | 0.087 | 0.012 | 0.156 | *1* | 0.153 | 0.097 | -0.043 | 0.120 |
|  | TB | 0.110 | *1* | **0.364** | 0.268 | **0.429** | 0.153 | *1* | 0.261 | 0.227 | **0.356** |
|  | NIEA | 0.087 | **0.364** | *1* | **0.797** | **0.676** | 0.097 | 0.261 | *1* | **0.718** | **0.520** |
|  | OAK | 0.012 | 0.268 | **0.797** | *1* | **0.713** | -0.043 | 0.227 | **0.718** | *1* | **0.647** |
|  | JEFF | 0.156 | **0.429** | **0.676** | **0.713** | *1* | 0.120 | **0.356** | **0.520** | **0.647** | *1* |
| *bla*VIM | LPCC | *1* | -0.034 | 0.067 | 0.003 | 0.117 | *1* | -0.034 | 0.106 | 0.015 | 0.258 |
|  | TB | -0.034 | *1* | -0.107 | -0.089 | -0.051 | -0.034 | *1* | -0.107 | -0.051 | -0.098 |
|  | NIEA | 0.067 | -0.107 | *1* | **0.619** | **0.464** | 0.106 | -0.107 | *1* | **0.591** | **0.455** |
|  | OAK | 0.003 | -0.089 | **0.619** | *1* | **0.430** | 0.015 | -0.051 | **0.591** | *1* | **0.453** |
|  | JEFF | 0.117 | -0.051 | **0.464** | **0.430** | *1* | 0.258 | -0.098 | **0.455** | **0.453** | *1* |
| *bla*VIM-7 | LPCC | *1* | **0.283** | 0.032 | -0.104 | -0.038 | *1* | 0.268 | 0.035 | -0.095 | 0.082 |
|  | TB | **0.283** | *1* | -0.054 | -0.229 | -0.020 | 0.268 | *1* | -0.048 | -0.209 | -0.063 |
|  | NIEA | 0.032 | -0.054 | *1* | **0.656** | 0.264 | 0.035 | -0.048 | *1* | **0.758** | **0.441** |
|  | OAK | -0.104 | -0.229 | **0.656** | *1* | 0.200 | -0.095 | -0.209 | **0.758** | *1* | **0.397** |
|  | JEFF | -0.038 | -0.020 | 0.264 | 0.200 | *1* | 0.082 | -0.063 | **0.441** | **0.397** | *1* |

**Table S2** Spearman’s correlation coefficients of ARGs between WWTPs for absolute and PMMoV normalized ARG concentrations. Bolding indicates correlations that were significant (p < 0.05)

**Table S3** Results of PERMANOVA from the NMDS analysis

| **Pairing** | **Absolute Concentration** | | **PMMoV Normalized** | |
| --- | --- | --- | --- | --- |
| **R2 Value** | **p Value** | **R2 Value** | **p Value** |
| LPCC & TB | 0.113 | 0.003 | 0.111 | 0.003 |
| LPCC & NIEA | 0.612 | 0.001 | 0.61 | 0.001 |
| LPCC & OAK | 0.561 | 0.001 | 0.56 | 0.001 |
| LPCC & JEFF | 0.267 | 0.001 | 0.264 | 0.001 |
| TB & NIEA | 0.705 | 0.001 | 0.702 | 0.001 |
| TB & OAK | 0.673 | 0.001 | 0.67 | 0.001 |
| TB & JEFF | 0.456 | 0.001 | 0.45 | 0.001 |
| NIEA & OAK | 0.388 | 0.187 | 0.388 | 0.187 |
| NIEA & JEFF | 0.227 | 0.001 | 0.228 | 0.001 |
| OAK & JEFF | 0.164 | 0.001 | 0.165 | 0.001 |

**Table S4** Results of the Mann-Kendall test for monotonic trends in absolute ARG concentration and PMMoV normalized ARG concentration. Bolding indicates Kendall’s τ where the degree of monotonicity was significant (p < 0.05)

|  |  | **Absolute Concentration** | | | | | **PMMoV Normalized** | | | | |
| --- | --- | --- | --- | --- | --- | --- | --- | --- | --- | --- | --- |
|  |  | **LPCC** | **TB** | **NIEA** | **OAK** | **JEFF** | **LPCC** | **TB** | **NIEA** | **OAK** | **JEFF** |
| *bla*KPC | Year | -0.157 | **-0.340** | **-0.214** | **-0.337** | **-0.195** | 0.042 | **0.155** | **0.223** | **0.195** | 0.152 |
|  | Summer | 0.099 | 0.010 | 0.199 | 0.209 | 0.165 | 0.297 | 0.371 | -0.033 | **0.407** | 0.099 |
|  | Fall | -0.051 | 0.204 | 0.348 | 0.282 | 0.282 | 0.256 | **0.327** | 0.385 | 0.333 | 0.154 |
|  | Winter | 0.205 | -0.275 | 0.000 | 0.091 | 0.182 | -0.231 | 0.043 | 0.424 | 0.121 | 0.152 |
|  | Spring | 0.333 | **-0.341** | 0.256 | 0.271 | **0.346** | **0.436** | -0.116 | 0.128 | 0.179 | 0.294 |
| *bla*NDM | Year | **0.239** | **-0.257** | **0.262** | -0.075 | -0.001 | **0.354** | -0.015 | **0.400** | **0.290** | 0.298 |
|  | Summer | -0.099 | 0.048 | **-0.429** | 0.121 | -0.253 | -0.033 | 0.352 | -0.385 | 0.187 | -0.209 |
|  | Fall | **0.452** | 0.177 | **0.513** | **0.462** | 0.000 | **0.632** | 0.277 | **0.513** | **0.564** | 0.128 |
|  | Winter | 0.385 | -0.171 | 0.152 | -0.273 | 0.273 | -0.179 | -0.069 | **0.515** | -0.152 | 0.273 |
|  | Spring | -0.128 | 0.041 | 0.077 | -0.282 | 0.105 | -0.256 | 0.215 | 0.077 | -0.103 | 0.085 |
| *bla*OXA-48 | Year | **-0.210** | **-0.391** | -0.100 | -0.166 | **-0.211** | -0.055 | **-0.156** | 0.134 | 0.127 | 0.035 |
|  | Summer | 0.110 | 0.200 | 0.099 | -0.209 | -0.187 | **0.451** | 0.333 | 0.033 | -0.275 | -0.121 |
|  | Fall | -0.385 | 0.153 | 0.333 | **0.462** | 0.179 | -0.128 | 0.113 | **0.487** | **0.513** | 0.256 |
|  | Winter | 0.154 | -0.116 | **0.455** | 0.182 | 0.182 | -0.103 | 0.036 | 0.394 | 0.212 | 0.061 |
|  | Spring | 0.359 | -0.101 | **0.436** | 0.205 | 0.229 | 0.205 | 0.058 | 0.282 | 0.231 | 0.242 |
| *bla*VIM | Year | -0.176 | -0.005 | -0.067 | **0.291** | -0.050 | -0.181 | -0.005 | 0.173 | **0.463** | 0.093 |
|  | Summer | -0.273 | NA | -0.319 | -0.297 | **-0.429** | -0.314 | NA | **-0.429** | -0.209 | -0.319 |
|  | Fall | NA | NA | 0.359 | **0.487** | 0.231 | NA | NA | 0.462 | **0.692** | 0.205 |
|  | Winter | -0.196 | -0.238 | 0.061 | **0.455** | 0.303 | -0.196 | -0.238 | 0.333 | 0.303 | 0.121 |
|  | Spring | NA | NA | -0.077 | -0.103 | 0.046 | NA | NA | -0.051 | -0.026 | 0.098 |
| *bla*VIM-7 | Year | **-0.217** | -0.143 | 0.106 | **0.284** | **-0.190** | -0.177 | -0.143 | **0.279** | **0.504** | 0.016 |
|  | Summer | 0.156 | 0.607 | **-0.297** | -0.231 | -0.253 | 0.179 | **0.580** | **-0.516** | -0.121 | -0.275 |
|  | Fall | -0.196 | 0.049 | 0.359 | **0.477** | 0.282 | -0.196 | 0.049 | 0.308 | **0.487** | 0.308 |
|  | Winter | 0.100 | -0.296 | 0.152 | 0.333 | 0.273 | 0.157 | -0.296 | 0.303 | 0.394 | 0.152 |
|  | Spring | -0.099 | 0.163 | -0.039 | -0.103 | 0.150 | -0.099 | 0.163 | 0.077 | 0.026 | 0.085 |
| PMMoV | Year | **-0.218** | **-0.375** | **-0.311** | **-0.474** | **-0.358** |  |  |  |  |  |
|  | Summer | -0.187 | -0.232 | 0.121 | -0.165 | 0.0989 |  |  |  |  |  |
|  | Fall | -0.308 | -0.207 | -0.282 | -0.400 | -0.205 |  |  |  |  |  |
|  | Winter | 0.410 | -0.217 | -0.303 | -0.242 | 0.0909 |  |  |  |  |  |
|  | Spring | 0.103 | -0.171 | 0.0513 | -0.179 | -0.163 |  |  |  |  |  |

|  | **Absolute Concentration** | | **PMMoV Normalized** | |
| --- | --- | --- | --- | --- |
|  | **R2 Value** | **p Value** | **R2 Value** | **p Value** |
| pH | 0.045 | 0.001 | 0.044 | 0.001 |
| Flow | 0.278 | 0.001 | 0.277 | 0.001 |
| Precipitation | 0.017 | 0.005 | 0.017 | 0.004 |
| CBOD | 0.003 | 0.265 | 0.003 | 0.292 |
| Ammonia | 0.001 | 0.671 | 0.001 | 0.681 |
| Phosphorous | 0.029 | 0.001 | 0.029 | 0.001 |
| TSS | 0.030 | 0.002 | 0.03 | 0.001 |
| Wastewater Temperature | 0.013 | 0.007 | 0.013 | 0.009 |
| Surface Temperature | 0.002 | 0.324 | 0.003 | 0.311 |

**Table S5** Results of the dbRDA analysis

**Table S6** Spearman’s correlation coefficients between ARGs (absolute and PMMoV normalized concentrations), wastewater physicochemical factors, and environmental factors. Bolding indicates correlations that were significant (p < 0.05)

|  |  | **Absolute Concentration** | | | | | **PMMoV Normalized** | | | | |
| --- | --- | --- | --- | --- | --- | --- | --- | --- | --- | --- | --- |
|  |  | ***bla*KPC** | ***bla*NDM** | ***bla*OXA-48** | ***bla*VIM** | ***bla*VIM-7** | ***bla*KPC** | ***bla*NDM** | ***bla*OXA-48** | ***bla*VIM** | ***bla*VIM-7** |
| LPCC | *bla*KPC | *1* | 0.237 | **0.631** | 0.070 | 0.467 | *1* | **0.307** | **0.645** | 0.133 | 0.123 |
|  | *bla*NDM | 0.237 | *1* | -0.137 | -0.189 | -0.259 | **0.307** | *1* | 0.093 | -0.111 | -0.168 |
|  | *bla*OXA-48 | **0.631** | -0.137 | *1* | -0.051 | 0.082 | **0.645** | 0.093 | *1* | -0.083 | 0.064 |
|  | *bla*VIM | 0.070 | -0.189 | -0.051 | *1* | **0.440** | 0.133 | -0.111 | -0.083 | *1* | **0.417** |
|  | *bla*VIM-7 | 0.467 | -0.259 | 0.082 | **0.440** | *1* | 0.123 | -0.168 | 0.064 | **0.417** | *1* |
|  | TSS | **0.289** | -0.014 | **0.402** | -0.163 | 0.036 | -0.077 | **-0.287** | 0.153 | -0.154 | 0.026 |
|  | Phosphorous | -0.003 | 0.194 | 0.097 | -0.136 | -0.022 | -0.073 | -0.048 | 0.039 | -0.137 | -0.008 |
|  | CBOD | **0.318** | 0.155 | **0.296** | 0.048 | 0.080 | -0.023 | -0.147 | -0.075 | 0.054 | 0.085 |
|  | Ammonia | 0.127 | 0.135 | -0.060 | 0.047 | -0.223 | -0.067 | 0.057 | -0.233 | 0.056 | -0.182 |
|  | Wastewater Temperature | **0.517** | -0.294 | **0.529** | 0.024 | 0.184 | 0.111 | **-0.616** | 0.199 | 0.019 | 0.136 |
|  | Surface Temperature | **0.428** | **-0.305** | **0.387** | 0.073 | 0.208 | 0.173 | **-0.541** | 0.092 | 0.073 | 0.188 |
|  | Precipitation | -0.260 | -0.164 | -0.226 | 0.148 | 0.144 | -0.134 | -0.144 | -0.206 | 0.148 | 0.141 |
|  | Flow | -0.163 | **-0.430** | 0.126 | 0.087 | **0.368** | -0.044 | -0.270 | 0.180 | 0.082 | **0.273** |
|  | pH | **-0.418** | 0.163 | **-0.368** | -0.028 | -0.169 | 0.042 | **0.513** | -0.008 | -0.026 | -0.131 |
| TB | *bla*KPC | *1* | **0.778** | **0.705** | 0.009 | -0.035 | *1* | **0.572** | **0.449** | -0.082 | -0.192 |
|  | *bla*NDM | **0.778** | *1* | **0.533** | 0.199 | 0.029 | **0.572** | *1* | **0.317** | 0.127 | -0.075 |
|  | *bla*OXA-48 | **0.705** | **0.533** | *1* | -0.091 | 0.061 | **0.449** | **0.317** | *1* | -0.136 | -0.034 |
|  | *bla*VIM | 0.009 | 0.199 | -0.091 | *1* | **0.360** | -0.082 | 0.127 | -0.136 | *1* | **0.360** |
|  | *bla*VIM-7 | -0.035 | 0.029 | 0.061 | **0.360** | *1* | -0.192 | -0.075 | -0.034 | **0.360** | *1* |
|  | TSS | **0.449** | **0.394** | **0.603** | 0.190 | **0.411** | **-0.305** | -0.029 | 0.205 | 0.190 | **0.409** |
|  | Phosphorous | **0.342** | **0.322** | **0.452** | 0.127 | 0.255 | -0.164 | 0.006 | 0.151 | 0.127 | 0.256 |
|  | CBOD | **0.385** | **0.439** | **0.420** | 0.095 | 0.115 | 0.011 | 0.261 | 0.252 | 0.095 | 0.122 |
|  | Ammonia | 0.264 | **0.273** | **0.404** | 0.018 | 0.104 | -0.227 | 0.037 | 0.159 | 0.018 | 0.107 |
|  | Wastewater Temperature | **0.298** | 0.160 | **0.388** | -0.005 | 0.128 | -0.040 | -0.016 | 0.237 | -0.005 | 0.124 |
|  | Surface Temperature | 0.102 | -0.001 | 0.124 | -0.145 | -0.029 | 0.061 | -0.008 | 0.168 | -0.145 | -0.034 |
|  | Precipitation | 0.091 | 0.072 | -0.136 | -0.063 | -0.060 | 0.211 | 0.154 | -0.032 | -0.063 | -0.064 |
|  | Flow | **-0.296** | -0.218 | **-0.446** | 0.045 | -0.079 | 0.049 | -0.054 | -0.267 | 0.045 | -0.081 |
|  | pH | **-0.272** | **-0.395** | **-0.274** | -0.190 | -0.108 | 0.176 | -0.126 | 0.023 | -0.190 | -0.113 |
| NIEA | *bla*KPC | *1* | 0.236 | **0.374** | **0.401** | 0.264 | *1* | **0.676** | **0.610** | **0.579** | **0.755** |
|  | *bla*NDM | 0.236 | *1* | 0.168 | **0.549** | **0.622** | **0.676** | *1* | **0.473** | **0.685** | **0.762** |
|  | *bla*OXA-48 | **0.374** | 0.168 | *1* | **0.359** | **0.323** | **0.610** | **0.473** | *1* | **0.496** | **0.606** |
|  | *bla*VIM | **0.401** | **0.549** | **0.359** | *1* | **0.704** | **0.579** | **0.685** | **0.496** | *1* | **0.772** |
|  | *bla*VIM-7 | 0.264 | **0.622** | **0.323** | **0.704** | *1* | **0.755** | **0.762** | **0.606** | **0.772** | *1* |
|  | TSS | 0.251 | 0.036 | 0.220 | 0.175 | 0.086 | -0.157 | -0.105 | -0.102 | -0.033 | **-0.174** |
|  | Phosphorous | 0.203 | **-0.291** | -0.093 | 0.066 | -0.091 | **-0.326** | **-0.436** | **-0.410** | -0.216 | **-0.382** |
|  | CBOD | **0.320** | -0.168 | 0.111 | 0.101 | 0.043 | -0.208 | **-0.299** | -0.251 | -0.172 | -0.264 |
|  | Ammonia | 0.149 | -0.212 | -0.057 | -0.102 | -0.265 | **-0.316** | **-0.354** | **-0.329** | **-0.347** | **-0.473** |
|  | Wastewater Temperature | **0.433** | **-0.322** | **0.298** | -0.003 | -0.261 | **-0.397** | **-0.557** | -0.184 | **-0.373** | **-0.562** |
|  | Surface Temperature | **0.333** | -0.047 | **0.392** | 0.104 | -0.061 | -0.187 | -0.206 | 0.070 | -0.104 | -0.261 |
|  | Precipitation | 0.019 | 0.253 | **0.414** | 0.142 | 0.171 | -0.068 | 0.122 | **0.315** | 0.139 | 0.119 |
|  | Flow | -0.195 | **0.323** | 0.248 | 0.034 | 0.165 | **0.276** | **0.425** | **0.517** | **0.327** | **0.409** |
|  | pH | **-0.300** | 0.244 | **-0.308** | -0.086 | 0.160 | **0.315** | **0.410** | 0.052 | 0.220 | 0.414 |
| OAK | *bla*KPC | *1* | **0.370** | **0.382** | -0.168 | -0.142 | *1* | **0.438** | **0.548** | **0.326** | **0.391** |
|  | *bla*NDM | **0.370** | *1* | 0.236 | 0.119 | 0.237 | **0.438** | *1* | **0.443** | **0.501** | **0.574** |
|  | *bla*OXA-48 | **0.382** | 0.236 | *1* | 0.234 | 0.181 | **0.548** | **0.443** | *1* | **0.552** | **0.528** |
|  | *bla*VIM | -0.168 | 0.119 | 0.234 | *1* | **0.771** | **0.326** | **0.501** | **0.552** | *1* | **0.872** |
|  | *bla*VIM-7 | -0.142 | 0.237 | 0.181 | **0.771** | *1* | **0.391** | **0.574** | **0.528** | **0.872** | *1* |
|  | TSS | **0.516** | 0.053 | **0.305** | -0.206 | -0.271 | -0.156 | **-0.456** | -0.077 | **-0.466** | **-0.553** |
|  | Phosphorous | **0.479** | 0.190 | -0.141 | **-0.298** | **-0.318** | **-0.291** | **-0.355** | **-0.508** | **-0.607** | **-0.655** |
|  | CBOD | **0.448** | 0.192 | -0.088 | **-0.278** | -0.273 | -0.255 | **-0.301** | **-0.407** | **-0.555** | **-0.578** |
|  | Ammonia | **0.511** | 0.227 | -0.058 | -0.197 | -0.249 | -0.101 | -0.270 | **-0.354** | **-0.451** | **-0.509** |
|  | Wastewater Temperature | **0.601** | 0.039 | **0.347** | **-0.446** | **-0.528** | -0.070 | **-0.495** | -0.095 | **-0.658** | **-0.754** |
|  | Surface Temperature | **0.325** | -0.080 | **0.490** | -0.152 | -0.237 | -0.001 | **-0.388** | 0.197 | **-0.288** | **-0.373** |
|  | Precipitation | -0.117 | -0.051 | **0.410** | 0.046 | 0.038 | -0.030 | -0.003 | **0.401** | 0.103 | 0.079 |
|  | Flow | **-0.372** | -0.160 | **0.306** | 0.242 | 0.227 | 0.175 | 0.253 | **0.520** | **0.472** | **0.461** |
|  | pH | **-0.526** | 0.039 | **-0.291** | **0.323** | **0.417** | 0.210 | **0.565** | 0.143 | **0.594** | **0.713** |
| JEFF | *bla*KPC | *1* | **0.513** | **0.503** | 0.205 | **0.373** | *1* | **0.583** | **0.630** | **0.365** | **0.480** |
|  | *bla*NDM | **0.513** | *1* | 0.222 | **0.410** | **0.467** | **0.583** | *1* | **0.489** | **0.529** | **0.525** |
|  | *bla*OXA-48 | **0.503** | 0.222 | *1* | **0.319** | **0.298** | **0.630** | **0.489** | *1* | **0.421** | **0.418** |
|  | *bla*VIM | 0.205 | **0.410** | **0.319** | *1* | **0.844** | **0.365** | **0.529** | **0.421** | *1* | **0.792** |
|  | *bla*VIM-7 | **0.373** | **0.467** | **0.298** | **0.844** | *1* | **0.480** | **0.525** | **0.418** | **0.792** | *1* |
|  | TSS | **0.353** | 0.140 | **0.450** | 0.073 | 0.183 | 0.137 | -0.022 | 0.252 | -0.029 | 0.009 |
|  | Phosphorous | 0.088 | -0.060 | -0.110 | 0.010 | 0.060 | **-0.290** | -0.197 | -0.255 | -0.106 | -0.134 |
|  | CBOD | 0.167 | -0.050 | -0.029 | -0.026 | 0.126 | -0.182 | -0.169 | -0.184 | -0.137 | -0.066 |
|  | Ammonia | **0.296** | 0.147 | -0.116 | 0.064 | 0.133 | -0.010 | -0.111 | -0.253 | -0.064 | 0.016 |
|  | Wastewater Temperature | **0.459** | 0.031 | **0.410** | -0.048 | 0.105 | 0.021 | **-0.318** | 0.101 | -0.235 | -0.162 |
|  | Surface Temperature | **0.288** | 0.211 | **0.463** | 0.163 | 0.231 | 0.161 | -0.004 | 0.264 | 0.042 | 0.092 |
|  | Precipitation | -0.075 | 0.080 | **0.303** | 0.088 | 0.029 | 0.056 | 0.156 | **0.321** | 0.115 | 0.045 |
|  | Flow | -0.140 | 0.113 | 0.162 | 0.116 | 0.026 | 0.251 | **0.278** | **0.340** | 0.237 | 0.228 |
|  | pH | -0.260 | -0.026 | -0.259 | -0.025 | -0.082 | 0.168 | **0.328** | 0.035 | 0.176 | 0.216 |
